# Supplementary material for: Single-cell multiomic profiling of human lungs reveals cell-type-specific and age-dynamic control of SARS-CoV2 host genes
Source: eLife. 2020 Nov 9;9:e62522. doi: 10.7554/eLife.62522 (PMC7688309; doi:10.7554/eLife.62522)
Supplement: Figure 3—source data 1. [file elife-62522-fig3-data1.xlsx]

## Sheet: Sheet1
Donor	Group	TMPRSS2 (median of log norm. expression in AT2 cells)
D062	30wk (GA)	1.91255
D150	30wk (GA)	1.67598
D088	30wk (GA)	1.85214
D032	3yo	1.88078
D046	3yo	1.496
D139	3yo	1.449
D122	30yo	1.92046
D175	30yo	1.81305
D231	30yo	1.57731
