# Supplementary material for: Single-cell multiomic profiling of human lungs reveals cell-type-specific and age-dynamic control of SARS-CoV2 host genes
Source: eLife. 2020 Nov 9;9:e62522. doi: 10.7554/eLife.62522 (PMC7688309; doi:10.7554/eLife.62522)
Supplement: Supplementary file 1. — Sheet 1: 30wkGA - 30yo: Donor ID, age, sex, race, clinical pathology diagnosis (clinPathDx), gestational age, overall quality of the lung tissue assessment, type of death and cause of death were listed. Not shown are data on body weight, body height, total lung weight and radial alveolar count assessment of alveolarization. All were all within normal limits for age. Abbreviations: DCD: donor after cardiac death; DBD: donor after brain death; GA: gestational age; RDS: respiratory distress syndrome. [file elife-62522-supp1.xlsx]

## Sheet: 30wk-30yo
Donor ID	Age	Sex	Race	ClinPathDx	Assessement of tissue quality	Type of Death	Cause of Death
D150	29 wkGA	M	White	Normal lung growth; late canalicular/early saccular	Very Good	DCD	Anencephaly
D088	31 wkGA	F	Unkn	Normal lung growth; late saccular	Good	DCD	Anencephaly
D062	29 wkGA	M	Unkn	RDS; early saccular lung	Excellent	DCD	DandyWalker brain anomaly
D032	3 yr	M	White	Normal growth and development	Very Good	DBD	Head Trauma
D046	3 yr	M	White	Normal growth and development	Very Good	DCD	Brain / C-spine trauma
D139	3 yr	F	White	Normal growth and development	Excellent	DBD	Brain injury
D122	31 yrs	M	Unkn	Normal growth and development, mild chronic bronchiolitis, anthracotic pigment	Excellent	DBD	Head trauma
D175	29 yrs	F	White	Normal growth and structure	Very Good	DCD	Head trauma
D231	33 yrs	F	Black/AA	Normal growth and development, patchy mild mixed inflammation	Excellent	DCD	Anoxic/hypoxic brain injury
D110	4 mon	M	Unkn	Normal lung growth and structure, Mildly increased alveolar macrophages,	Excellent	DBD	Head Trauma
