# Supplementary material for: Single-cell multiomic profiling of human lungs reveals cell-type-specific and age-dynamic control of SARS-CoV2 host genes
Source: eLife. 2020 Nov 9;9:e62522. doi: 10.7554/eLife.62522 (PMC7688309; doi:10.7554/eLife.62522)
Supplement: Supplementary file 2. [file elife-62522-supp2.xlsx]

## Sheet: Sheet1
snRNA-seq data overview
Donor	Age group	Sequencing reads (#)	Sequencing saturation	Nuclei (#)	Sequenced reads/nucleus	Genes per nucleus (median)	UMI per nucleus (median)
D150	29 wkGA	136687782	61.7	6271	19402	1815	3404
D088	31 wkGA	104572515	62.7	5903	15153	1247	2171
D062	29 wkGA	96018318	50.8	4852	15782	1910	3725.5
D032	3 yr	79949462	52.2	4970	13633	1168	1939
D046	3 yr	142915170	47.7	8894	13612	1472	2663.5
D139	3 yr	94244269	55	5217	16319	1499	2721
D122	31 yrs	63322971	55.2	3935	13418	1252	2025
D175	29 yrs	49421402	60.2	1778	24909	1346	2196.5
D231	33 yrs	87929844	49.7	4680	14778	1458	2829.5
snATAC data overview
Donor	Age group	Sequencing reads (#)	PCR duplicates (%)	Nuclei (#)	Reads/nucleus (median)	Fraction of reads in peaks (%)
D150	29 wkGA	99758040	52.0888	9132	5751	55.6558
D088	31 wkGA	116559053	53.0676	9233	5840	50.0841
D062	29 wkGA	77573242	56.4633	7709	3716	52.7099
D032	3 yr	201407645	51	8244	12444	54.0673
D032-2	3 yr	182264535	57.1616	8821	9108	59.7501
D046	3 yr	178139124	63.1077	9298	16032	60.1773
D139	3 yr	89792355	62.1068	5144	3920	43.7759
D122	31 yrs	91111372	54.8516	6083	4352	42.9295
D175	29 yrs	128884538	37	8369	8218	39.8868
D231	33 yrs	137648906	53.0136	9650	7448	54.1681
D110	4 mon	153856251	57	9297	9442	54.7375
