# Supplementary material for: Single-cell multiomic profiling of human lungs reveals cell-type-specific and age-dynamic control of SARS-CoV2 host genes
Source: eLife. 2020 Nov 9;9:e62522. doi: 10.7554/eLife.62522 (PMC7688309; doi:10.7554/eLife.62522)
Supplement: Supplementary file 4. [file elife-62522-supp4.xlsx]

## Sheet: ACE2
Chromosome	Start	End	Locus	Cluster	Cluster	Cluster	Cluster	Cluster	Cluster	Cluster	Cluster	Cluster	Cluster	Cluster	Cluster	Cluster	Cluster	Cluster	Cluster	Cluster	Cluster	Cluster	Cluster
chrX	15374252	15375079	ACE2		AT1	AT2						club			macro	matfib1	matfib2	myofib			peri		tcell
chrX	15492185	15492564	ACE2		AT1	AT2						club											tcell
chrX	15510963	15511963	ACE2	art	AT1	AT2	bas	bcell	cap1	cap2	cil	club	ery	lymph	macro	matfib1	matfib2	myofib	neuro	nkcell	peri	tcell
chrX	15542491	15543017	ACE2	art	AT1	AT2			cap1	cap2	cil	club
chrX	15553422	15553622	ACE2			AT2
chrX	15566818	15567947	ACE2		AT1	AT2										matfib1
chrX	15568285	15568514	ACE2		AT1
chrX	15583162	15583884	ACE2	art	AT1	AT2	bas		cap1	cap2	cil	club		lymph	macro	matfib1	matfib2	myofib	neuro	nkcell	peri
chrX	15586032	15586707	ACE2		AT1	AT2					cil	club
chrX	15592154	15592896	ACE2			AT2						club
chrX	15597902	15598862	ACE2		AT1	AT2	bas		cap1	cap2	cil	club	ery				matfib2
chrX	15619854	15620564	ACE2		AT1	AT2	bas				cil	club
chrX	15625094	15625560	ACE2			AT2	bas			cap2	cil	club
chrX	15692493	15694103	ACE2	art	AT1	AT2	bas	bcell	cap1	cap2	cil	club	ery	lymph	macro	matfib1	matfib2	myofib	neuro	nkcell	peri	tcell
chrX	15808042	15809520	ACE2	art	AT1	AT2	bas	bcell	cap1	cap2	cil	club	ery	lymph	macro	matfib1	matfib2	myofib	neuro	nkcell	peri	tcell

## Sheet: TMPRSS2
Chromosome	Start	End	Gene	Age increasing TMPRSS2-peak #	Age-increasing pattern in AT2 cells?	Cluster	Cluster	Cluster	Cluster	Cluster	Cluster	Cluster	Cluster	Cluster	Cluster	Cluster	Cluster	Cluster	Cluster	Cluster	Cluster	Cluster	Cluster	Cluster
chr21	42213470	42214304	TMPRSS2				AT1	AT2	bas				cil	club		lymph	macro	matfib1		myofib	neuro		peri
chr21	42235740	42236522	TMPRSS2	1	increasing with age		AT1	AT2						club			macro	matfib1					peri
chr21	42417435	42418470	TMPRSS2				AT1	AT2	bas				cil	club
chr21	42538861	42541214	TMPRSS2			art	AT1	AT2	bas	bcell	cap1	cap2	cil	club	ery	lymph	macro	matfib1	matfib2	myofib		nkcell	peri	tcell
chr21	42579265	42580615	TMPRSS2			art	AT1	AT2	bas		cap1		cil	club	ery	lymph		matfib1	matfib2	myofib			peri
chr21	42613267	42613797	TMPRSS2						bas				cil	club
chr21	42619458	42620366	TMPRSS2			art	AT1	AT2	bas				cil	club		lymph		matfib1	matfib2	myofib
chr21	42688159	42689767	TMPRSS2				AT1	AT2	bas	bcell	cap1		cil	club		lymph	macro	matfib1	matfib2		neuro		peri	tcell
chr21	42738493	42739109	TMPRSS2	2	increasing with age		AT1	AT2	bas			cap2	cil	club			macro			myofib
chr21	42768336	42769207	TMPRSS2	3	increasing with age	art	AT1	AT2	bas				cil	club			macro
chr21	42782955	42784068	TMPRSS2	4	increasing with age	art	AT1	AT2			cap1	cap2	cil	club			macro		matfib2
chr21	42790737	42791149	TMPRSS2	5	increasing with age			AT2
chr21	42797584	42799185	TMPRSS2	6	increasing with age	art	AT1	AT2	bas	bcell	cap1	cap2	cil	club		lymph	macro	matfib1	matfib2	myofib		nkcell	peri	tcell
chr21	42831670	42833603	TMPRSS2	7	increasing with age	art	AT1	AT2	bas		cap1	cap2	cil	club		lymph	macro	matfib1	matfib2	myofib				tcell
chr21	42839182	42840459	TMPRSS2				AT1	AT2					cil	club		lymph	macro	matfib1	matfib2	myofib			peri
chr21	42849684	42851096	TMPRSS2	8	increasing with age	art	AT1	AT2	bas				cil	club			macro	matfib1		myofib		nkcell	peri
chr21	42852043	42852319	TMPRSS2				AT1
chr21	42856817	42857017	TMPRSS2										cil
chr21	42857466	42858575	TMPRSS2	9	increasing with age	art	AT1	AT2	bas		cap1			club				matfib1	matfib2	myofib			peri
chr21	42863315	42863841	TMPRSS2	10	increasing with age		AT1	AT2
chr21	42868037	42868413	TMPRSS2				AT1
chr21	42869023	42869416	TMPRSS2				AT1	AT2
chr21	42870210	42870898	TMPRSS2					AT2
chr21	42872358	42873348	TMPRSS2				AT1	AT2					cil	club
chr21	42878008	42879397	TMPRSS2			art	AT1	AT2	bas				cil	club				matfib1	matfib2
chr21	42879626	42880765	TMPRSS2				AT1	AT2	bas		cap1		cil	club			macro	matfib1				nkcell	peri	tcell
chr21	42893113	42893847	TMPRSS2				AT1	AT2
chr21	42897731	42898267	TMPRSS2					AT2					cil	club
chr21	42901239	42902682	TMPRSS2				AT1	AT2						club
chr21	42907866	42909029	TMPRSS2				AT1	AT2	bas				cil	club
chr21	42909210	42909673	TMPRSS2				AT1	AT2
chr21	42924803	42925359	TMPRSS2				AT1	AT2	bas					club
chr21	42933986	42934622	TMPRSS2	11	increasing with age		AT1	AT2					cil	club			macro
chr21	42936753	42937284	TMPRSS2	12	increasing with age			AT2	bas				cil	club			macro
chr21	42937429	42937931	TMPRSS2				AT1	AT2						club
chr21	42954912	42955654	TMPRSS2				AT1	AT2	bas		cap1		cil	club			macro	matfib1					peri
chr21	43013135	43014459	TMPRSS2				AT1	AT2	bas				cil	club			macro	matfib1					peri
chr21	43018809	43019813	TMPRSS2	13	increasing with age		AT1	AT2	bas	bcell	cap1		cil	club			macro						peri
chr21	43021606	43022427	TMPRSS2				AT1	AT2						club				matfib1					peri
chr21	43025666	43026075	TMPRSS2					AT2	bas				cil	club
chr21	43026268	43026468	TMPRSS2						bas
chr21	43030334	43031111	TMPRSS2	14	increasing with age		AT1	AT2					cil				macro
chr21	43032328	43033637	TMPRSS2				AT1	AT2	bas	bcell	cap1		cil	club		lymph	macro	matfib1	matfib2	myofib			peri	tcell
chr21	43035777	43036073	TMPRSS2																matfib2	myofib
chr21	43052092	43052608	TMPRSS2				AT1	AT2	bas				cil	club
chr21	43053043	43053344	TMPRSS2					AT2
chr21	43054276	43054993	TMPRSS2				AT1	AT2	bas				cil	club				matfib1
chr21	43063369	43063938	TMPRSS2				AT1	AT2	bas				cil	club				matfib1
chr21	43073911	43074824	TMPRSS2				AT1	AT2	bas									matfib1	matfib2	myofib
chr21	43097903	43098186	TMPRSS2					AT2					cil	club
chr21	43098375	43099739	TMPRSS2	15	increasing with age	art	AT1	AT2	bas		cap1	cap2	cil	club		lymph	macro	matfib1	matfib2	myofib	neuro	nkcell	peri
chr21	43100695	43100998	TMPRSS2											club
chr21	43101223	43101427	TMPRSS2														macro
chr21	43101534	43101813	TMPRSS2										cil
chr21	43104481	43105094	TMPRSS2				AT1	AT2	bas				cil	club				matfib1	matfib2
chr21	43124302	43124713	TMPRSS2				AT1	AT2					cil	club
chr21	43126702	43128169	TMPRSS2	16	increasing with age		AT1	AT2	bas				cil	club			macro
chr21	43132380	43133232	TMPRSS2					AT2					cil				macro	matfib1
chr21	43156543	43157242	TMPRSS2	17	increasing with age		AT1	AT2
chr21	43171506	43173052	TMPRSS2				AT1	AT2	bas				cil	club									peri
chr21	43181100	43182651	TMPRSS2	18	increasing with age	art	AT1	AT2	bas		cap1	cap2	cil	club		lymph	macro	matfib1	matfib2	myofib			peri
chr21	43186326	43187491	TMPRSS2				AT1	AT2	bas	bcell	cap1		cil	club			macro	matfib1		myofib	neuro	nkcell	peri	tcell
chr21	43198069	43198840	TMPRSS2			art	AT1	AT2	bas		cap1	cap2	cil	club			macro	matfib1	matfib2	myofib	neuro		peri
chr21	43248704	43249273	TMPRSS2										cil								neuro
chr21	43297986	43300059	TMPRSS2			art	AT1	AT2	bas	bcell	cap1	cap2	cil	club	ery	lymph	macro	matfib1	matfib2	myofib		nkcell	peri	tcell
chr21	43346292	43347172	TMPRSS2			art	AT1	AT2		bcell	cap1	cap2	cil	club			macro	matfib1	matfib2			nkcell	peri	tcell
chr21	43352335	43354205	TMPRSS2						bas		cap1	cap2	cil		ery		macro	matfib1	matfib2	myofib			peri
chr21	43373402	43374730	TMPRSS2			art	AT1	AT2	bas	bcell	cap1	cap2	cil	club		lymph	macro	matfib1	matfib2	myofib		nkcell	peri	tcell
chr21	43376285	43376652	TMPRSS2				AT1		bas				cil	club
chr21	43388384	43389302	TMPRSS2				AT1	AT2	bas				cil	club			macro	matfib1
chr21	43429191	43431275	TMPRSS2			art	AT1	AT2	bas	bcell	cap1	cap2	cil	club	ery	lymph	macro	matfib1	matfib2	myofib	neuro	nkcell	peri	tcell
chr21	43477040	43478406	TMPRSS2			art	AT1	AT2	bas		cap1	cap2	cil	club				matfib1		myofib			peri
chr21	43481381	43484293	TMPRSS2	19	increasing with age		AT1	AT2		bcell			cil	club	ery		macro					nkcell	peri	tcell

## Sheet: BSG
Chromosome	Start	End	Gene	Cluster	Cluster	Cluster	Cluster	Cluster	Cluster	Cluster	Cluster	Cluster	Cluster	Cluster	Cluster	Cluster	Cluster	Cluster	Cluster	Cluster	Cluster	Cluster
chr19	266976	267709	BSG	art	AT1	AT2		bcell	cap1	cap2	cil	club	ery	lymph	macro	matfib1	matfib2	myofib			peri	tcell
chr19	289694	291931	BSG	art	AT1	AT2	bas		cap1	cap2	cil	club		lymph	macro		matfib2				peri	tcell
chr19	307842	308955	BSG	art					cap1	cap2					macro
chr19	310341	311146	BSG						cap1	cap2	cil				macro		matfib2
chr19	311805	312362	BSG	art					cap1	cap2
chr19	313430	313834	BSG											lymph
chr19	344054	345215	BSG	art	AT1	AT2	bas	bcell	cap1	cap2	cil	club	ery	lymph	macro	matfib1	matfib2	myofib		nkcell	peri	tcell
chr19	383878	384652	BSG	art		AT2			cap1	cap2				lymph			matfib2	myofib			peri
chr19	386683	387191	BSG		AT1	AT2					cil	club
chr19	408425	410226	BSG	art	AT1	AT2			cap1	cap2	cil	club		lymph		matfib1	matfib2			nkcell	peri	tcell
chr19	447656	448395	BSG						cap1	cap2				lymph							peri
chr19	459656	461303	BSG	art	AT1	AT2	bas		cap1	cap2	cil	club		lymph	macro	matfib1	matfib2	myofib	neuro		peri	tcell
chr19	461568	462394	BSG	art	AT1	AT2			cap1	cap2	cil	club		lymph	macro	matfib1	matfib2		neuro		peri
chr19	474136	475125	BSG	art					cap1	cap2
chr19	479920	480532	BSG	art	AT1	AT2	bas		cap1	cap2	cil	club		lymph	macro	matfib1	matfib2	myofib			peri
chr19	488446	489900	BSG	art	AT1	AT2	bas	bcell	cap1	cap2	cil	club	ery	lymph	macro	matfib1	matfib2	myofib	neuro	nkcell	peri	tcell
chr19	495370	496016	BSG	art		AT2			cap1	cap2		club	ery		macro	matfib1	matfib2
chr19	497655	498116	BSG			AT2									macro
chr19	498205	498755	BSG			AT2					cil										peri
chr19	506536	508042	BSG	art	AT1	AT2	bas	bcell	cap1	cap2	cil	club	ery	lymph	macro	matfib1	matfib2	myofib	neuro	nkcell	peri	tcell
chr19	510646	511931	BSG	art				bcell	cap1	cap2			ery		macro					nkcell		tcell
chr19	512361	513286	BSG		AT1	AT2					cil	club
chr19	516556	517445	BSG										ery
chr19	517722	519630	BSG		AT1	AT2	bas			cap2	cil		ery		macro	matfib1	matfib2	myofib		nkcell		tcell
chr19	530788	533412	BSG	art	AT1	AT2	bas	bcell	cap1	cap2	cil	club	ery	lymph	macro	matfib1	matfib2	myofib		nkcell	peri	tcell
chr19	543550	544571	BSG					bcell	cap1	cap2					macro					nkcell		tcell
chr19	555791	556796	BSG	art	AT1	AT2	bas		cap1	cap2	cil	club	ery		macro	matfib1	matfib2	myofib		nkcell	peri	tcell
chr19	566366	567054	BSG												macro	matfib1	matfib2
chr19	570922	573612	BSG	art	AT1	AT2	bas	bcell	cap1	cap2	cil	club	ery	lymph	macro	matfib1	matfib2	myofib	neuro	nkcell	peri	tcell
chr19	574679	575054	BSG										ery
chr19	575504	575721	BSG										ery
chr19	584313	585041	BSG	art	AT1	AT2	bas	bcell	cap1	cap2	cil		ery		macro	matfib1	matfib2					tcell
chr19	588061	588787	BSG			AT2			cap1	cap2		club			macro						peri
chr19	589562	590051	BSG	art			bas								macro							tcell
chr19	591372	591861	BSG	art	AT1	AT2	bas		cap1	cap2	cil	club			macro	matfib1	matfib2	myofib			peri
chr19	608663	609426	BSG	art		AT2			cap1	cap2				lymph	macro
chr19	610089	611554	BSG			AT2		bcell	cap1	cap2	cil				macro	matfib1	matfib2	myofib		nkcell	peri	tcell
chr19	615663	616461	BSG		AT1	AT2			cap1	cap2		club			macro						peri
chr19	632344	633998	BSG	art	AT1	AT2	bas	bcell	cap1	cap2	cil	club	ery	lymph	macro	matfib1	matfib2	myofib	neuro	nkcell	peri	tcell
chr19	639206	640233	BSG	art	AT1	AT2	bas	bcell	cap1	cap2	cil	club	ery	lymph	macro	matfib1	matfib2	myofib	neuro	nkcell	peri	tcell
chr19	659229	659846	BSG				bas								macro						peri
chr19	660326	660803	BSG																			tcell
chr19	661024	661746	BSG					bcell							macro					nkcell		tcell
chr19	662190	663844	BSG	art	AT1	AT2	bas	bcell	cap1	cap2	cil	club	ery	lymph	macro	matfib1	matfib2	myofib	neuro	nkcell	peri	tcell
chr19	664931	665244	BSG	art	AT1	AT2			cap1	cap2	cil	club			macro	matfib1	matfib2	myofib			peri
chr19	671714	672281	BSG			AT2									macro	matfib1
chr19	672847	673212	BSG													matfib1	matfib2
chr19	676220	676678	BSG		AT1											matfib1	matfib2
chr19	677160	677788	BSG		AT1											matfib1	matfib2	myofib			peri
chr19	679686	681618	BSG	art	AT1	AT2	bas	bcell	cap1	cap2	cil	club	ery	lymph	macro	matfib1	matfib2	myofib	neuro	nkcell	peri	tcell
chr19	703441	704570	BSG	art	AT1	AT2		bcell	cap1	cap2	cil	club	ery	lymph	macro	matfib1	matfib2	myofib	neuro	nkcell	peri	tcell
chr19	708449	710622	BSG	art	AT1	AT2	bas		cap1	cap2	cil	club		lymph		matfib1	matfib2	myofib			peri
chr19	718770	721130	BSG	art	AT1	AT2			cap1					lymph	macro	matfib1	matfib2	myofib
chr19	722503	723142	BSG	art				bcell	cap1	cap2				lymph
chr19	727147	728608	BSG	art					cap1	cap2				lymph	macro	matfib1	matfib2		neuro		peri
chr19	732280	732497	BSG													matfib1
chr19	733865	734601	BSG	art	AT1	AT2	bas	bcell	cap1	cap2	cil	club	ery		macro	matfib1	matfib2	myofib		nkcell	peri	tcell
chr19	737764	738090	BSG	art	AT1	AT2								lymph	macro	matfib1	matfib2					tcell
chr19	743201	743817	BSG		AT1	AT2	bas				cil	club					matfib2				peri
chr19	745172	745560	BSG													matfib1
chr19	750791	752008	BSG		AT1	AT2	bas		cap1		cil	club			macro		matfib2	myofib
chr19	752504	753538	BSG		AT1	AT2	bas		cap1	cap2	cil	club			macro	matfib1	matfib2	myofib			peri
chr19	768373	768966	BSG		AT1	AT2										matfib1	matfib2	myofib
chr19	769882	770739	BSG		AT1	AT2	bas	bcell	cap1		cil	club	ery		macro	matfib1		myofib				tcell
chr19	771216	771620	BSG					bcell	cap1	cap2	cil				macro	matfib1
chr19	778794	779569	BSG			AT2	bas		cap1					lymph		matfib1	matfib2	myofib			peri
chr19	781983	783904	BSG	art	AT1	AT2	bas		cap1	cap2	cil	club		lymph	macro	matfib1	matfib2				peri
chr19	784472	784902	BSG		AT1	AT2					cil	club
chr19	788750	790083	BSG	art					cap1	cap2				lymph	macro	matfib1					peri
chr19	791641	792140	BSG						cap1	cap2			ery
chr19	796721	798401	BSG	art	AT1	AT2	bas	bcell	cap1	cap2	cil	club	ery	lymph	macro	matfib1	matfib2	myofib	neuro	nkcell	peri	tcell
chr19	802114	802410	BSG			AT2						club
chr19	814032	815171	BSG						cap1						macro	matfib1
chr19	817117	817518	BSG		AT1	AT2
chr19	821221	822660	BSG	art		AT2			cap1	cap2	cil				macro	matfib1	matfib2					tcell
chr19	826194	826898	BSG													matfib1		myofib			peri
chr19	827518	828370	BSG							cap2				lymph	macro	matfib1
chr19	834111	834662	BSG													matfib1					peri
chr19	835387	835885	BSG													matfib1
chr19	843402	843865	BSG		AT1	AT2			cap1	cap2		club			macro	matfib1
chr19	844066	845126	BSG		AT1	AT2					cil	club	ery			matfib1		myofib			peri
chr19	850289	851218	BSG	art	AT1	AT2	bas		cap1	cap2	cil	club	ery	lymph	macro	matfib1	matfib2	myofib			peri
chr19	859117	860102	BSG					bcell							macro	matfib1	matfib2
chr19	860352	861023	BSG		AT1	AT2	bas	bcell	cap1	cap2	cil	club			macro	matfib1	matfib2	myofib	neuro	nkcell	peri	tcell
chr19	861794	863208	BSG	art	AT1	AT2	bas		cap1	cap2	cil	club	ery		macro	matfib1	matfib2	myofib		nkcell	peri	tcell
chr19	863777	864215	BSG			AT2		bcell	cap1	cap2	cil			lymph	macro			myofib		nkcell	peri	tcell
chr19	869310	870241	BSG													matfib1	matfib2	myofib
chr19	870973	871650	BSG													matfib1		myofib			peri
chr19	871731	873716	BSG	art	AT1	AT2	bas	bcell	cap1	cap2		club	ery		macro		matfib2	myofib		nkcell		tcell
chr19	883619	884265	BSG		AT1	AT2	bas					club
chr19	892319	893918	BSG	art	AT1	AT2	bas	bcell	cap1	cap2	cil	club	ery	lymph	macro	matfib1	matfib2	myofib	neuro	nkcell	peri	tcell
chr19	900142	900973	BSG		AT1	AT2			cap1		cil		ery		macro	matfib1						tcell
chr19	907124	907689	BSG					bcell					ery		macro							tcell
chr19	908630	909645	BSG		AT1	AT2	bas	bcell			cil	club	ery	lymph	macro					nkcell		tcell
chr19	912553	913718	BSG	art	AT1	AT2	bas	bcell	cap1	cap2	cil	club	ery	lymph	macro	matfib1	matfib2	myofib	neuro	nkcell	peri	tcell
chr19	917565	918011	BSG			AT2		bcell							macro
chr19	919889	920627	BSG			AT2		bcell							macro	matfib1				nkcell		tcell
chr19	921595	922042	BSG	art	AT1	AT2			cap1	cap2	cil	club	ery	lymph	macro	matfib1	matfib2	myofib		nkcell	peri	tcell
chr19	925011	926277	BSG	art	AT1	AT2	bas	bcell	cap1	cap2	cil	club	ery	lymph	macro	matfib1	matfib2	myofib	neuro	nkcell	peri	tcell
chr19	926592	927567	BSG			AT2						club			macro	matfib1
chr19	928094	928350	BSG													matfib1
chr19	928839	929086	BSG		AT1	AT2
chr19	932726	933798	BSG						cap1	cap2				lymph	macro	matfib1	matfib2	myofib		nkcell	peri	tcell
chr19	934574	935510	BSG	art	AT1	AT2	bas	bcell	cap1	cap2	cil	club	ery	lymph	macro	matfib1	matfib2	myofib	neuro	nkcell	peri
chr19	940423	941533	BSG	art	AT1	AT2	bas	bcell	cap1	cap2	cil	club	ery		macro	matfib1	matfib2	myofib	neuro	nkcell	peri	tcell
chr19	944089	944551	BSG										ery				matfib2
chr19	947458	948416	BSG		AT1	AT2		bcell						lymph	macro
chr19	952582	953801	BSG	art	AT1	AT2	bas		cap1		cil	club			macro	matfib1				nkcell		tcell
chr19	956421	957287	BSG		AT1	AT2					cil	club				matfib1
chr19	960915	961631	BSG	art		AT2			cap1	cap2			ery		macro
chr19	962217	962641	BSG	art		AT2			cap1	cap2	cil		ery		macro
chr19	982540	983104	BSG	art	AT1	AT2	bas	bcell	cap1	cap2	cil	club	ery	lymph	macro	matfib1	matfib2	myofib		nkcell	peri	tcell
chr19	983896	984844	BSG	art	AT1	AT2	bas	bcell	cap1	cap2	cil	club	ery	lymph	macro	matfib1	matfib2	myofib	neuro	nkcell	peri	tcell
chr19	991327	992183	BSG		AT1	AT2	bas		cap1	cap2	cil		ery	lymph	macro	matfib1	matfib2			nkcell
chr19	995127	995849	BSG			AT2						club
chr19	996050	996850	BSG		AT1	AT2	bas					club								nkcell		tcell
chr19	1000095	1000920	BSG		AT1	AT2		bcell	cap1	cap2	cil	club	ery		macro	matfib1						tcell
chr19	1001341	1002175	BSG	art	AT1	AT2	bas	bcell	cap1	cap2	cil	club	ery	lymph	macro	matfib1	matfib2	myofib	neuro	nkcell	peri	tcell
chr19	1008957	1010590	BSG		AT1				cap1	cap2			ery		macro	matfib1	matfib2	myofib			peri
chr19	1016603	1017043	BSG	art					cap1	cap2				lymph
chr19	1017269	1017596	BSG											lymph
chr19	1020332	1021970	BSG	art	AT1	AT2	bas	bcell	cap1	cap2	cil	club	ery	lymph	macro	matfib1	matfib2	myofib	neuro	nkcell	peri	tcell
chr19	1022501	1023044	BSG		AT1											matfib1
chr19	1026216	1027778	BSG	art	AT1	AT2		bcell	cap1	cap2	cil	club	ery	lymph	macro	matfib1	matfib2	myofib		nkcell	peri	tcell
chr19	1027806	1028996	BSG	art	AT1	AT2	bas	bcell	cap1	cap2	cil	club			macro	matfib1	matfib2	myofib		nkcell	peri	tcell
chr19	1030486	1031049	BSG			AT2						club	ery							nkcell		tcell
chr19	1039684	1041579	BSG	art	AT1	AT2	bas	bcell	cap1	cap2	cil	club	ery	lymph	macro	matfib1	matfib2	myofib	neuro	nkcell	peri	tcell
chr19	1064453	1065226	BSG	art	AT1	AT2			cap1	cap2	cil	club			macro	matfib1	matfib2	myofib			peri	tcell
chr19	1065374	1066558	BSG		AT1	AT2	bas				cil	club
chr19	1066791	1068521	BSG	art	AT1	AT2		bcell	cap1	cap2	cil	club			macro	matfib1				nkcell		tcell
chr19	1068534	1068745	BSG													matfib1
chr19	1069090	1069757	BSG				bas	bcell	cap1	cap2					macro					nkcell	peri	tcell
chr19	1074472	1076332	BSG	art	AT1	AT2		bcell	cap1	cap2	cil	club	ery		macro			myofib	neuro	nkcell	peri	tcell
chr19	1076903	1077413	BSG					bcell	cap1	cap2	cil				macro					nkcell		tcell
chr19	1081626	1082979	BSG	art	AT1	AT2	bas	bcell	cap1	cap2	cil	club	ery	lymph	macro	matfib1	matfib2	myofib	neuro	nkcell	peri	tcell
chr19	1087400	1089114	BSG		AT1			bcell		cap2	cil				macro		matfib2	myofib		nkcell		tcell
chr19	1094883	1096076	BSG	art	AT1	AT2	bas	bcell	cap1	cap2	cil	club	ery	lymph	macro	matfib1	matfib2	myofib	neuro	nkcell	peri	tcell
chr19	1097873	1098292	BSG		AT1	AT2					cil								neuro
chr19	1098552	1099046	BSG		AT1	AT2					cil				macro
chr19	1101352	1102225	BSG	art	AT1	AT2			cap1	cap2		club			macro	matfib1	matfib2	myofib			peri
chr19	1102447	1102881	BSG		AT1	AT2					cil	club			macro	matfib1	matfib2	myofib
chr19	1103632	1105054	BSG	art	AT1	AT2	bas	bcell	cap1	cap2	cil	club	ery	lymph	macro	matfib1	matfib2	myofib	neuro	nkcell	peri	tcell
chr19	1112095	1112535	BSG		AT1	AT2	bas				cil	club
chr19	1113039	1114029	BSG	art	AT1	AT2	bas	bcell	cap1	cap2	cil	club	ery	lymph	macro	matfib1	matfib2	myofib	neuro	nkcell	peri	tcell
chr19	1122800	1123476	BSG	art	AT1	AT2			cap1		cil	club	ery	lymph	macro	matfib1	matfib2
chr19	1131562	1133893	BSG	art	AT1	AT2	bas	bcell	cap1	cap2	cil	club		lymph	macro	matfib1	matfib2	myofib		nkcell	peri	tcell
chr19	1134353	1134714	BSG						cap1	cap2				lymph
chr19	1136004	1136601	BSG	art					cap1	cap2				lymph
chr19	1141938	1142345	BSG			AT2			cap1		cil				macro			myofib
chr19	1146404	1146608	BSG			AT2
chr19	1148097	1148434	BSG			AT2
chr19	1151899	1152580	BSG	art					cap1	cap2							matfib2				peri
chr19	1154461	1156099	BSG	art	AT1	AT2	bas	bcell	cap1	cap2	cil	club		lymph	macro	matfib1	matfib2	myofib	neuro		peri	tcell
chr19	1161432	1162124	BSG		AT1	AT2	bas				cil	club				matfib1
chr19	1162722	1163998	BSG												macro						peri
chr19	1166747	1167266	BSG		AT1	AT2						club
chr19	1167689	1168291	BSG			AT2	bas					club
chr19	1168810	1169397	BSG												macro	matfib1	matfib2	myofib			peri
chr19	1169848	1170525	BSG			AT2	bas				cil	club				matfib1	matfib2	myofib			peri
chr19	1172604	1174592	BSG	art	AT1	AT2		bcell	cap1	cap2	cil	club	ery	lymph	macro	matfib1	matfib2	myofib		nkcell	peri	tcell
chr19	1180295	1180979	BSG	art	AT1	AT2	bas	bcell	cap1	cap2	cil	club			macro	matfib1	matfib2	myofib		nkcell	peri	tcell
chr19	1181601	1182077	BSG		AT1	AT2	bas				cil	club				matfib1
chr19	1183658	1184226	BSG		AT1	AT2					cil	club									peri
chr19	1190536	1190796	BSG			AT2
chr19	1194263	1195046	BSG	art	AT1	AT2	bas	bcell	cap1	cap2	cil	club	ery	lymph	macro	matfib1	matfib2	myofib		nkcell	peri	tcell
chr19	1205253	1206185	BSG	art	AT1	AT2	bas	bcell	cap1	cap2	cil	club	ery	lymph	macro	matfib1	matfib2	myofib	neuro	nkcell	peri	tcell
chr19	1207114	1208301	BSG	art	AT1				cap1	cap2	cil		ery	lymph	macro	matfib1	matfib2	myofib			peri
chr19	1213458	1214536	BSG	art	AT1	AT2	bas		cap1	cap2	cil	club	ery	lymph	macro	matfib1		myofib		nkcell	peri	tcell
chr19	1215019	1215568	BSG	art	AT1	AT2			cap1	cap2						matfib1		myofib			peri
chr19	1218072	1218730	BSG													matfib1					peri
chr19	1220636	1221943	BSG	art	AT1	AT2	bas		cap1	cap2	cil	club		lymph	macro	matfib1	matfib2	myofib
chr19	1230802	1231167	BSG			AT2
chr19	1231737	1233486	BSG		AT1	AT2	bas				cil	club		lymph	macro			myofib			peri
chr19	1237188	1237547	BSG	art					cap1	cap2											peri
chr19	1237757	1238263	BSG		AT1	AT2	bas	bcell	cap1	cap2		club			macro	matfib1	matfib2	myofib			peri	tcell
chr19	1239891	1240628	BSG	art	AT1	AT2	bas	bcell	cap1	cap2	cil	club		lymph	macro	matfib1	matfib2	myofib	neuro	nkcell	peri	tcell
chr19	1241476	1242210	BSG	art	AT1	AT2	bas	bcell	cap1	cap2	cil	club	ery	lymph	macro	matfib1	matfib2	myofib		nkcell	peri	tcell
chr19	1244426	1244723	BSG		AT1	AT2	bas				cil				macro	matfib1	matfib2	myofib			peri
chr19	1244994	1245335	BSG												macro
chr19	1248031	1250053	BSG	art	AT1	AT2	bas	bcell	cap1	cap2	cil	club	ery	lymph	macro	matfib1	matfib2	myofib	neuro	nkcell	peri	tcell
chr19	1252019	1253849	BSG	art	AT1	AT2	bas	bcell	cap1	cap2	cil	club		lymph	macro	matfib1	matfib2	myofib	neuro	nkcell	peri	tcell
chr19	1259134	1261410	BSG	art	AT1	AT2	bas	bcell	cap1	cap2	cil	club	ery	lymph	macro	matfib1	matfib2	myofib	neuro	nkcell	peri	tcell
chr19	1261894	1262920	BSG	art	AT1	AT2					cil	club	ery
chr19	1265391	1267204	BSG	art	AT1	AT2		bcell	cap1	cap2	cil	club	ery	lymph	macro	matfib1	matfib2	myofib		nkcell	peri	tcell
chr19	1268940	1270303	BSG	art	AT1	AT2	bas	bcell	cap1	cap2	cil	club	ery	lymph	macro	matfib1	matfib2	myofib	neuro	nkcell	peri	tcell
chr19	1275021	1276255	BSG	art	AT1	AT2	bas	bcell	cap1	cap2	cil	club	ery	lymph	macro	matfib1	matfib2	myofib	neuro	nkcell	peri	tcell
chr19	1279765	1280010	BSG			AT2									macro	matfib1
chr19	1285477	1286310	BSG	art	AT1	AT2			cap1	cap2		club				matfib1	matfib2	myofib	neuro		peri
chr19	1295338	1296134	BSG			AT2		bcell	cap1	cap2	cil	club			macro					nkcell
chr19	1315567	1316204	BSG	art	AT1	AT2		bcell	cap1	cap2	cil	club		lymph	macro	matfib1	matfib2	myofib
chr19	1324802	1325765	BSG	art	AT1	AT2			cap1	cap2	cil			lymph	macro	matfib1	matfib2	myofib			peri
chr19	1333078	1333701	BSG		AT1	AT2					cil	club									peri
chr19	1354300	1355366	BSG	art	AT1	AT2	bas	bcell	cap1	cap2	cil	club	ery	lymph	macro	matfib1	matfib2	myofib		nkcell	peri	tcell
chr19	1355649	1355956	BSG													matfib1	matfib2
chr19	1360596	1361768	BSG	art					cap1	cap2		club			macro	matfib1	matfib2	myofib			peri
chr19	1367255	1367916	BSG												macro	matfib1					peri
chr19	1373307	1374011	BSG			AT2		bcell	cap1	cap2					macro			myofib			peri
chr19	1383118	1384387	BSG	art	AT1	AT2	bas	bcell	cap1	cap2	cil	club	ery	lymph	macro	matfib1	matfib2	myofib	neuro	nkcell	peri	tcell
chr19	1400610	1401887	BSG	art	AT1	AT2	bas	bcell	cap1	cap2	cil	club			macro	matfib1	matfib2	myofib	neuro	nkcell	peri	tcell
chr19	1406609	1409315	BSG	art	AT1	AT2	bas	bcell	cap1	cap2	cil	club	ery	lymph	macro	matfib1	matfib2	myofib	neuro	nkcell	peri	tcell
chr19	1411708	1412164	BSG																		peri
chr19	1414946	1416173	BSG	art	AT1	AT2	bas	bcell	cap1	cap2	cil	club	ery	lymph	macro	matfib1	matfib2	myofib			peri	tcell
chr19	1429423	1430523	BSG		AT1	AT2						club			macro		matfib2				peri	tcell
chr19	1437743	1439082	BSG	art	AT1	AT2	bas	bcell	cap1	cap2	cil	club	ery	lymph	macro	matfib1	matfib2	myofib		nkcell	peri	tcell
chr19	1444767	1446411	BSG	art	AT1	AT2		bcell	cap1	cap2	cil	club	ery	lymph	macro	matfib1	matfib2	myofib		nkcell	peri	tcell
chr19	1453388	1454095	BSG		AT1	AT2			cap1						macro	matfib1		myofib			peri
chr19	1455050	1456267	BSG	art	AT1	AT2		bcell	cap1	cap2		club	ery		macro	matfib1	matfib2			nkcell		tcell
chr19	1465355	1466129	BSG	art	AT1	AT2			cap1	cap2	cil			lymph	macro
chr19	1468732	1469872	BSG		AT1	AT2				cap2					macro	matfib1				nkcell	peri	tcell
chr19	1470187	1471416	BSG	art	AT1	AT2		bcell	cap1		cil	club			macro	matfib1	matfib2					tcell
chr19	1478582	1479766	BSG	art	AT1	AT2	bas	bcell	cap1	cap2	cil	club	ery	lymph	macro	matfib1	matfib2	myofib	neuro	nkcell	peri	tcell
chr19	1490176	1491519	BSG	art	AT1	AT2	bas	bcell	cap1	cap2	cil	club	ery	lymph	macro	matfib1	matfib2	myofib	neuro	nkcell	peri	tcell
chr19	1496286	1496804	BSG		AT1	AT2					cil	club

## Sheet: CTSL
Chromosome	Start	End	Gene	Cluster	Cluster	Cluster	Cluster	Cluster	Cluster	Cluster	Cluster	Cluster	Cluster	Cluster	Cluster	Cluster	Cluster	Cluster	Cluster	Cluster	Cluster	Cluster
chr9	89560605	89562983	CTSL	art	AT1	AT2	bas	bcell	cap1	cap2	cil	club	ery	lymph	macro	matfib1	matfib2	myofib	neuro	nkcell	peri	tcell
chr9	89563368	89563816	CTSL	art	AT1	AT2	bas	bcell	cap1	cap2		club			macro	matfib1	matfib2	myofib		nkcell	peri	tcell
chr9	89734201	89734891	CTSL		AT1	AT2	bas		cap1	cap2	cil	club		lymph		matfib1		myofib			peri
chr9	89763074	89764064	CTSL	art	AT1	AT2	bas		cap1	cap2	cil	club		lymph	macro	matfib1	matfib2	myofib		nkcell	peri	tcell
chr9	89869915	89870925	CTSL													matfib1	matfib2	myofib			peri
chr9	89951231	89952991	CTSL	art	AT1	AT2	bas			cap2	cil	club			macro	matfib1	matfib2	myofib	neuro		peri
chr9	89957670	89958261	CTSL		AT1	AT2										matfib1	matfib2	myofib			peri
chr9	89958888	89959402	CTSL		AT1		bas				cil	club
chr9	89995798	89996984	CTSL		AT1	AT2	bas				cil	club				matfib1	matfib2	myofib
chr9	90043617	90043965	CTSL			AT2	bas				cil	club
chr9	90112393	90113804	CTSL	art	AT1	AT2	bas	bcell	cap1	cap2	cil	club	ery	lymph	macro	matfib1	matfib2	myofib	neuro	nkcell	peri	tcell
chr9	90117161	90118053	CTSL		AT1	AT2					cil	club			macro
chr9	90124561	90125590	CTSL	art					cap1	cap2			ery	lymph		matfib1	matfib2	myofib
chr9	90129966	90130339	CTSL												macro
chr9	90130844	90132175	CTSL	art	AT1	AT2		bcell	cap1					lymph	macro		matfib2				peri
chr9	90132646	90133024	CTSL					bcell
chr9	90133488	90134240	CTSL	art	AT1	AT2			cap1	cap2		club	ery	lymph	macro	matfib1	matfib2
chr9	90139064	90139584	CTSL												macro
chr9	90144457	90145798	CTSL		AT1	AT2	bas					club			macro
chr9	90168937	90170428	CTSL			AT2									macro	matfib1	matfib2
chr9	90170693	90172168	CTSL		AT1	AT2								lymph	macro			myofib	neuro			tcell
chr9	90175175	90175710	CTSL												macro
chr9	90179058	90179339	CTSL		AT1	AT2									macro
chr9	90184372	90186577	CTSL	art	AT1	AT2	bas		cap1		cil	club		lymph	macro	matfib1	matfib2
chr9	90208285	90208987	CTSL												macro	matfib1
chr9	90220216	90220868	CTSL																			tcell
chr9	90221881	90223219	CTSL	art	AT1	AT2						club			macro	matfib1			neuro
chr9	90226801	90227001	CTSL												macro
chr9	90243282	90244513	CTSL												macro
chr9	90250115	90251276	CTSL		AT1	AT2						club			macro
chr9	90255120	90256313	CTSL	art	AT1	AT2	bas				cil	club		lymph		matfib1	matfib2	myofib			peri
chr9	90268625	90269292	CTSL												macro
chr9	90271986	90272584	CTSL		AT1	AT2					cil				macro
chr9	90273368	90273861	CTSL													matfib1		myofib
chr9	90285458	90285698	CTSL			AT2
chr9	90289430	90290029	CTSL										ery
chr9	90291575	90292468	CTSL		AT1										macro	matfib1
chr9	90293615	90294099	CTSL	art					cap1	cap2					macro	matfib1	matfib2
chr9	90300414	90301830	CTSL						cap1		cil		ery	lymph	macro	matfib1	matfib2				peri	tcell
chr9	90307367	90308062	CTSL												macro
chr9	90308829	90309802	CTSL												macro
chr9	90319533	90319890	CTSL												macro
chr9	90323062	90323337	CTSL												macro
chr9	90326638	90327427	CTSL		AT1	AT2			cap1	cap2	cil	club	ery		macro	matfib1	matfib2			nkcell
chr9	90327952	90328922	CTSL			AT2			cap1	cap2		club	ery	lymph	macro	matfib1	matfib2	myofib	neuro		peri	tcell
chr9	90329707	90330021	CTSL			AT2	bas				cil	club				matfib1
chr9	90333717	90334299	CTSL			AT2									macro
chr9	90337242	90337917	CTSL												macro
chr9	90340291	90341634	CTSL	art	AT1	AT2	bas	bcell	cap1	cap2	cil	club	ery	lymph	macro	matfib1	matfib2	myofib	neuro	nkcell	peri	tcell
chr9	90347347	90349549	CTSL												macro
chr9	90363546	90364808	CTSL	art					cap1	cap2
chr9	90391535	90392265	CTSL										ery		macro
chr9	90397923	90398631	CTSL												macro
chr9	90400139	90400774	CTSL				bas						ery
chr9	90402656	90402982	CTSL												macro
chr9	90407516	90408752	CTSL	art	AT1	AT2		bcell	cap1	cap2			ery		macro	matfib1	matfib2	myofib		nkcell	peri	tcell
chr9	90410102	90410477	CTSL										ery
chr9	90411161	90411614	CTSL		AT1										macro
chr9	90413271	90413506	CTSL											lymph
chr9	90418752	90419540	CTSL										ery
chr9	90425464	90426091	CTSL										ery
chr9	90427200	90428198	CTSL		AT1	AT2								lymph	macro	matfib1	matfib2
chr9	90449040	90449773	CTSL										ery		macro
chr9	90454759	90455665	CTSL												macro
chr9	90466177	90466387	CTSL												macro
chr9	90467990	90468971	CTSL												macro				neuro
chr9	90488661	90489424	CTSL												macro
chr9	90497640	90497894	CTSL												macro
chr9	90498285	90499445	CTSL												macro
chr9	90588790	90590059	CTSL	art	AT1	AT2	bas	bcell	cap1	cap2	cil	club	ery	lymph	macro	matfib1	matfib2	myofib	neuro	nkcell	peri	tcell
chr9	90690946	90692332	CTSL	art	AT1	AT2	bas	bcell	cap1	cap2	cil	club	ery	lymph	macro	matfib1	matfib2	myofib	neuro	nkcell	peri	tcell
chr9	90794910	90795495	CTSL		AT1	AT2	bas				cil	club			macro
chr9	90851726	90853072	CTSL		AT1									lymph		matfib1	matfib2	myofib				tcell

## Sheet: FURIN
Chromosome	Start	End	Gene	Cluster	Cluster	Cluster	Cluster	Cluster	Cluster	Cluster	Cluster	Cluster	Cluster	Cluster	Cluster	Cluster	Cluster	Cluster	Cluster	Cluster	Cluster	Cluster
chr15	90514675	90515117	FURIN	art	AT1	AT2	bas		cap1	cap2	cil	club		lymph		matfib1		myofib		nkcell		tcell
chr15	90542132	90544225	FURIN		AT1	AT2		bcell	cap1	cap2	cil	club			macro		matfib2
chr15	90544489	90545957	FURIN	art	AT1	AT2	bas	bcell	cap1	cap2	cil	club	ery	lymph	macro	matfib1	matfib2	myofib		nkcell	peri	tcell
chr15	90577446	90579445	FURIN	art	AT1	AT2	bas	bcell	cap1	cap2	cil	club	ery	lymph	macro	matfib1	matfib2	myofib	neuro	nkcell	peri	tcell
chr15	90579933	90580718	FURIN		AT1	AT2						club				matfib1
chr15	90589861	90590785	FURIN		AT1	AT2	bas	bcell			cil	club			macro	matfib1
chr15	90605147	90607527	FURIN		AT1	AT2	bas	bcell	cap1	cap2	cil	club	ery		macro	matfib1	matfib2		neuro	nkcell	peri	tcell
chr15	90608141	90608828	FURIN	art	AT1				cap1	cap2				lymph	macro						peri
chr15	90614287	90615060	FURIN	art	AT1	AT2			cap1	cap2	cil		ery	lymph	macro	matfib1	matfib2	myofib		nkcell	peri	tcell
chr15	90644701	90646228	FURIN	art	AT1	AT2	bas	bcell	cap1	cap2	cil	club	ery	lymph	macro	matfib1	matfib2	myofib	neuro	nkcell	peri	tcell
chr15	90701138	90701972	FURIN	art	AT1	AT2	bas	bcell	cap1	cap2	cil	club	ery	lymph	macro	matfib1	matfib2	myofib	neuro	nkcell	peri	tcell
chr15	90708740	90709598	FURIN	art	AT1	AT2	bas		cap1	cap2	cil	club		lymph	macro	matfib1	matfib2	myofib			peri
chr15	90717566	90719042	FURIN		AT1	AT2	bas		cap1	cap2	cil	club		lymph		matfib1	matfib2	myofib	neuro		peri
chr15	90727139	90728845	FURIN	art	AT1	AT2	bas	bcell	cap1	cap2	cil	club	ery	lymph	macro	matfib1	matfib2	myofib	neuro	nkcell	peri	tcell
chr15	90733087	90733436	FURIN										ery
chr15	90734005	90735687	FURIN	art	AT1	AT2	bas	bcell	cap1	cap2	cil	club	ery		macro	matfib1	matfib2	myofib		nkcell	peri	tcell
chr15	90736036	90736859	FURIN							cap2					macro	matfib1	matfib2	myofib			peri
chr15	90743982	90745487	FURIN	art	AT1	AT2	bas	bcell	cap1	cap2	cil	club	ery	lymph	macro	matfib1	matfib2	myofib		nkcell	peri	tcell
chr15	90756468	90757391	FURIN		AT1	AT2	bas	bcell			cil	club	ery					myofib	neuro
chr15	90764345	90765074	FURIN	art	AT1	AT2		bcell	cap1	cap2	cil	club	ery		macro	matfib1	matfib2	myofib		nkcell	peri
chr15	90776481	90777722	FURIN	art	AT1	AT2	bas	bcell	cap1	cap2	cil	club	ery	lymph	macro	matfib1	matfib2	myofib	neuro	nkcell	peri	tcell
chr15	90792108	90793243	FURIN	art	AT1	AT2	bas	bcell	cap1	cap2	cil	club	ery	lymph	macro	matfib1	matfib2	myofib	neuro	nkcell	peri	tcell
chr15	90807732	90809702	FURIN	art	AT1	AT2	bas	bcell	cap1	cap2	cil	club	ery	lymph	macro	matfib1	matfib2	myofib		nkcell	peri	tcell
chr15	90836413	90837188	FURIN	art	AT1	AT2	bas	bcell	cap1	cap2	cil	club	ery	lymph	macro	matfib1	matfib2	myofib	neuro	nkcell		tcell
chr15	90863100	90863887	FURIN	art	AT1	AT2	bas	bcell	cap1	cap2	cil	club	ery	lymph	macro	matfib1	matfib2	myofib		nkcell	peri	tcell
chr15	90895018	90896196	FURIN	art	AT1	AT2	bas	bcell	cap1	cap2	cil	club	ery	lymph	macro	matfib1	matfib2	myofib	neuro	nkcell	peri	tcell
chr15	90930954	90932342	FURIN	art	AT1	AT2	bas	bcell	cap1	cap2	cil	club	ery	lymph	macro	matfib1	matfib2	myofib	neuro	nkcell	peri	tcell
chr15	90943671	90945117	FURIN	art	AT1	AT2	bas	bcell	cap1	cap2	cil	club	ery	lymph	macro	matfib1	matfib2	myofib	neuro	nkcell	peri	tcell
chr15	91006376	91007045	FURIN	art					cap1	cap2				lymph
chr15	91072571	91074321	FURIN	art	AT1	AT2	bas	bcell	cap1	cap2	cil	club	ery	lymph	macro	matfib1	matfib2	myofib	neuro	nkcell	peri	tcell
chr15	91100759	91101827	FURIN	art	AT1	AT2					cil			lymph	macro	matfib1	matfib2	myofib
chr15	91103348	91104052	FURIN	art					cap1	cap2				lymph		matfib1	matfib2	myofib			peri
chr15	91140252	91141868	FURIN	art		AT2		bcell	cap1	cap2	cil	club	ery	lymph	macro	matfib1	matfib2	myofib			peri	tcell
chr15	91203468	91204474	FURIN			AT2							ery		macro	matfib1	matfib2	myofib		nkcell	peri	tcell
chr15	91208032	91209476	FURIN	art	AT1	AT2	bas	bcell	cap1	cap2	cil	club	ery	lymph	macro	matfib1	matfib2	myofib	neuro	nkcell	peri	tcell
chr15	91243961	91245578	FURIN						cap1						macro
chr15	91259958	91261079	FURIN	art	AT1	AT2	bas	bcell	cap1	cap2	cil	club	ery	lymph	macro	matfib1	matfib2	myofib	neuro	nkcell	peri	tcell
chr15	91359569	91360063	FURIN																	nkcell		tcell
chr15	91372972	91374565	FURIN	art		AT2	bas		cap1	cap2		club			macro		matfib2			nkcell	peri	tcell
chr15	91381179	91381821	FURIN	art				bcell		cap2					macro			myofib		nkcell		tcell
chr15	91383910	91384625	FURIN		AT1	AT2							ery
chr15	91385071	91385451	FURIN										ery
chr15	91395678	91396614	FURIN					bcell		cap2			ery		macro					nkcell		tcell
chr15	91399791	91400418	FURIN					bcell												nkcell		tcell
chr15	91409454	91409763	FURIN		AT1	AT2					cil	club
chr15	91412749	91413403	FURIN	art	AT1	AT2	bas	bcell	cap1	cap2		club			macro	matfib1	matfib2	myofib			peri	tcell
chr15	91414233	91416385	FURIN	art	AT1	AT2	bas	bcell	cap1	cap2	cil	club	ery	lymph	macro	matfib1	matfib2	myofib		nkcell	peri	tcell
chr15	91417188	91417745	FURIN		AT1	AT2	bas				cil	club				matfib1
chr15	91426870	91429541	FURIN	art	AT1	AT2	bas	bcell	cap1	cap2	cil	club	ery	lymph	macro	matfib1	matfib2	myofib	neuro	nkcell	peri	tcell
chr15	91438437	91439393	FURIN	art					cap1	cap2				lymph	macro		matfib2				peri
chr15	91444846	91446883	FURIN	art	AT1	AT2	bas	bcell	cap1	cap2	cil	club	ery	lymph	macro	matfib1	matfib2	myofib	neuro	nkcell	peri	tcell
chr15	91447039	91447331	FURIN										ery
chr15	91473055	91474049	FURIN	art	AT1	AT2		bcell	cap1	cap2	cil	club	ery	lymph	macro	matfib1	matfib2	myofib	neuro	nkcell	peri	tcell
chr15	91474943	91476034	FURIN	art	AT1	AT2	bas	bcell	cap1	cap2	cil	club	ery	lymph	macro	matfib1	matfib2	myofib	neuro	nkcell	peri	tcell
chr15	91477549	91477839	FURIN		AT1	AT2			cap1		cil	club	ery		macro	matfib1	matfib2	myofib	neuro	nkcell		tcell
chr15	91478088	91478990	FURIN	art	AT1	AT2	bas	bcell	cap1	cap2	cil	club	ery	lymph	macro	matfib1	matfib2	myofib	neuro	nkcell	peri	tcell
chr15	91492537	91493215	FURIN										ery
chr15	91497774	91498740	FURIN	art	AT1	AT2	bas	bcell	cap1	cap2	cil	club	ery	lymph	macro	matfib1	matfib2	myofib	neuro	nkcell	peri	tcell
chr15	91499808	91500724	FURIN	art	AT1	AT2	bas		cap1	cap2	cil	club	ery	lymph	macro	matfib1	matfib2	myofib			peri
chr15	91531556	91532617	FURIN	art							cil				macro
chr15	91537244	91538360	FURIN	art	AT1	AT2	bas	bcell	cap1	cap2	cil	club	ery	lymph	macro	matfib1	matfib2	myofib	neuro	nkcell	peri	tcell
chr15	91547600	91547992	FURIN										ery
chr15	91565041	91566278	FURIN	art	AT1	AT2	bas	bcell	cap1	cap2	cil	club	ery	lymph	macro	matfib1	matfib2	myofib	neuro	nkcell	peri	tcell
chr15	91576047	91576724	FURIN		AT1	AT2	bas		cap1		cil	club	ery		macro	matfib1					peri	tcell
