# Supplementary material for: Single-cell multiomic profiling of human lungs reveals cell-type-specific and age-dynamic control of SARS-CoV2 host genes
Source: eLife. 2020 Nov 9;9:e62522. doi: 10.7554/eLife.62522 (PMC7688309; doi:10.7554/eLife.62522)
Supplement: Supplementary file 7. [file elife-62522-supp7.xlsx]

## Sheet: Sheet1
Variant*	Chr	Position	Disrupted TF motifs	Common**	deltaSVM effect***	deltaSVM q-value
21:42235781:A:C	chr21	42235781	STAT1,IRF
21:42235792:C:T	chr21	42235792	STAT1,IRF
21:42235793:G:A	chr21	42235793	STAT1,IRF		-3.28749	0.0229043
21:42235830:C:T	chr21	42235830	ETS
21:42235865:G:T	chr21	42235865	PROX1
21:42235871:G:A	chr21	42235871	IRF
21:42235885:A:C	chr21	42235885	NKX2-3,NKX3-2,NKX2-6,NKX2-8,NKX2-1,NKX2-5,NKX2-2,NKX2-4,NKX3-1
21:42235893:C:T	chr21	42235893	NKX2-3
21:42235907:C:T	chr21	42235907	NF1
21:42235908:G:A	chr21	42235908	TLX,NF1
21:42235910:A:G	chr21	42235910	TFAP2C,TFAP2,TLX,TFAP2A,NF1
21:42235916:T:C	chr21	42235916	TLX,NF1
21:42235922:G:T	chr21	42235922	ETS,NF1
21:42235923:A:T	chr21	42235923	ETS
21:42235932:T:C	chr21	42235932	TEAD,TEAD1,TEAD4,TEAD3
21:42235933:G:A	chr21	42235933	TEAD,TEAD1,TEAD4,TEAD3		-3.1306	0.0332396
21:42235952:G:A	chr21	42235952	NKX3-1
21:42235983:T:C	chr21	42235983	NF1
21:42236014:C:T	chr21	42236014	TEAD,TEAD1,TEAD4,TEAD3
21:42236050:G:A	chr21	42236050	STAT,IRF
21:42236078:A:T	chr21	42236078	FOXA2,FOXA1
21:42236087:G:C	chr21	42236087	TEAD,TEAD1,TEAD4,TEAD3		4.81479	0.000152043
21:42236228:C:T	chr21	42236228	FOXA1
21:42236234:T:C	chr21	42236234	HNF1B
21:42236237:G:A	chr21	42236237	ETS,NKX1-1
21:42236341:C:CT	chr21	42236341	NKX3-1
21:42236373:C:T	chr21	42236373	KLF14
21:42236377:C:G	chr21	42236377	KLF14
21:42236384:C:CA	chr21	42236384	ETS
21:42236386:C:A	chr21	42236386	ETS
21:42236387:G:A	chr21	42236387	ETS,ETS1
21:42236477:T:C	chr21	42236477	NFY,NKX1-1	rs9984669
21:42236478:G:A	chr21	42236478	NFY,NKX1-1
21:42738613:C:T	chr21	42738613	CTCF
21:42738614:G:A	chr21	42738614	CTCF
21:42738614:G:C	chr21	42738614	CTCF
21:42738671:C:T	chr21	42738671	RUNX1
21:42738679:T:C	chr21	42738679	RUNX1
21:42738693:T:C	chr21	42738693	STAT1
21:42738721:A:T	chr21	42738721	ETS,ETS1
21:42738743:AC:A	chr21	42738743	ETS,ETS1
21:42738796:G:T	chr21	42738796	NKX2-1,FOXA1
21:42738824:C:T	chr21	42738824	KLF16,KLF7,KLF4
21:42738830:C:G	chr21	42738830	KLF16,KLF7,KLF4		-2.61252	0.097148
21:42738869:C:T	chr21	42738869	FOXA2,FOXA,FOXA1
21:42738884:G:A	chr21	42738884	NKX2-2,NKX2-1		5.49847	7.4267e-06
21:42738887:GT:G	chr21	42738887	MEF2
21:42738924:A:G	chr21	42738924	IRF2,IRF,IRF1,IRF4
21:42738974:G:A	chr21	42738974	JUND
21:42739051:G:C	chr21	42739051	RUNX1
21:42768350:G:A	chr21	42768350	CTCF
21:42768366:C:A	chr21	42768366	OSR2,CTCF		-2.92222	0.0527403
21:42768407:G:A	chr21	42768407	IRF
21:42768453:G:C	chr21	42768453	RUNX1
21:42768455:G:T	chr21	42768455	RUNX1
21:42768480:C:T	chr21	42768480	STAT1,TEAD,STAT,STAT4,STAT3,STAT5
21:42768481:G:A	chr21	42768481	STAT1,STAT,STAT4,STAT3,STAT5
21:42768511:G:A	chr21	42768511	STAT
21:42768541:T:G	chr21	42768541	RUNX1,RUNX,RUNX2,RUNX3
21:42768549:C:T	chr21	42768549	CEBP,CEBPD,CEBPB,CEBPE,CEBPG
21:42768550:G:A	chr21	42768550	CEBP,CEBPD,CEBPB,CEBPE,CEBPG
21:42768552:A:G	chr21	42768552	CEBP,CEBPD,CEBPB,CEBPE,CEBPG		-4.03956	0.00265251
21:42768558:A:T	chr21	42768558	PROX1
21:42768589:A:C	chr21	42768589	NKX3-1
21:42768590:G:A	chr21	42768590	NKX3-1
21:42768592:A:G	chr21	42768592	FOXA2,FOXA,NKX3-1
21:42768597:G:A	chr21	42768597	NKX2-5,FOXA2,FOXA,FOXA1,NKX3-1
21:42768599:A:G	chr21	42768599	FOXA2,FOXA,FOXA1		-3.21222	0.0274145
21:42768609:C:T	chr21	42768609	ETS
21:42768651:G:A	chr21	42768651	NFY
21:42768728:A:G	chr21	42768728	CEBPB
21:42768819:C:A	chr21	42768819	TFAP2C,TFAP2,TFAP2B,TFAP2A
21:42768827:G:A	chr21	42768827	TFAP2C,TFAP2,KLF16
21:42768829:G:C	chr21	42768829	KLF16
21:42768833:G:C	chr21	42768833	KLF16
21:42768839:C:T	chr21	42768839	ETS
21:42768843:A:G	chr21	42768843	TFAP2C,ETS,TFAP2,TFAP2B,TFAP2A,ETS1
21:42768843:A:T	chr21	42768843	ETS,ETS1
21:42768900:C:T	chr21	42768900	STAT		4.10281	0.00215327
21:42768915:G:A	chr21	42768915	NKX2-2		3.05125	0.0398355
21:42768949:G:C	chr21	42768949	TEAD1,TEAD3		-3.07467	0.0378029
21:42768971:G:A	chr21	42768971	TLX		-2.77726	0.0709394
21:42768971:G:C	chr21	42768971	KLF4
21:42768972:T:G	chr21	42768972	TLX	rs395834
21:42769036:T:C	chr21	42769036	TEAD,TEAD4
21:42769063:G:A	chr21	42769063	TLX	rs392399
21:42769063:G:T	chr21	42769063	TLX	rs392399
21:42769067:C:T	chr21	42769067	TLX
21:42769091:A:G	chr21	42769091	ETS		-3.28303	0.0231618
21:42769117:G:C	chr21	42769117	KLF4
21:42782965:G:A	chr21	42782965	KLF16
21:42782967:G:A	chr21	42782967	KLF16,KLF7
21:42782973:G:A	chr21	42782973	KLF16,KLF12,KLF7,KLF4,KLF13,KLF5,KLF14		-3.51121	0.0128241
21:42783029:C:T	chr21	42783029	CEBP
21:42783030:G:A	chr21	42783030	CEBP
21:42783107:G:A	chr21	42783107	TEAD1
21:42783159:A:G	chr21	42783159	TLX
21:42783161:C:G	chr21	42783161	TLX,NF1
21:42783163:T:C	chr21	42783163	TLX
21:42783256:T:G	chr21	42783256	NKX3-1
21:42783287:A:G	chr21	42783287	TFAP2
21:42783335:C:A	chr21	42783335	CTCF		4.58756	0.000378823
21:42783379:C:T	chr21	42783379	RUNX1
21:42783388:T:C	chr21	42783388	TFAP2C,TFAP2,TFAP2B,TFAP2A
21:42783392:C:T	chr21	42783392	KLF7
21:42783401:C:G	chr21	42783401	KLF16,KLF12,KLF7,KLF4,KLF5,KLF14
21:42783474:G:C	chr21	42783474	PLAG1
21:42783493:C:G	chr21	42783493	CTCF		-4.39744	0.000771262
21:42783493:C:T	chr21	42783493	CTCF
21:42783494:G:A	chr21	42783494	CTCF		-3.62821	0.00927516
21:42783494:G:T	chr21	42783494	CTCF		-5.01841	6.39011e-05
21:42783504:G:C	chr21	42783504	CTCF,TLX,NKX2-1,NF1		-3.1051	0.0352476
21:42783509:G:T	chr21	42783509	TLX,NF1
21:42783519:C:G	chr21	42783519	NKX2-5,NKX3-2,NKX2-6,NKX2-1
21:42783531:TA:T	chr21	42783531	NFY
21:42783534:A:G	chr21	42783534	TFAP2C,TFAP2
21:42783696:T:C	chr21	42783696	MEF2
21:42783722:C:A	chr21	42783722	NKX2-3,NKX2-4,NKX2-8,NKX2-1
21:42783769:G:C	chr21	42783769	RUNX1,RUNX3
21:42783866:A:G	chr21	42783866	CTCF
21:42783905:T:A	chr21	42783905	ETS,STAT,ETS1
21:42783921:AG:A	chr21	42783921	KLF4
21:42783923:G:A	chr21	42783923	KLF4
21:42783997:T:G	chr21	42783997	ETS
21:42783998:T:C	chr21	42783998	ETS
21:42784010:GTC:G	chr21	42784010	NF1
21:42784024:GA:G	chr21	42784024	IRF3,IRF
21:42784031:C:T	chr21	42784031	STAT,IRF3,IRF
21:42790755:C:T	chr21	42790755	CEBPD		3.7426	0.00667439
21:42790792:T:C	chr21	42790792	PLAG1		-2.6043	0.0986013
21:42790802:C:G	chr21	42790802	STAT
21:42790826:A:G	chr21	42790826	HNF1
21:42790864:T:C	chr21	42790864	CEBPB,IRF3,IRF
21:42790879:G:A	chr21	42790879	STAT1,IRF
21:42790882:C:A	chr21	42790882	NKX2-2,NKX2-4,IRF3,NKX2-6,IRF,NKX2-1
21:42790898:T:C	chr21	42790898	ETS
21:42790900:C:T	chr21	42790900	ETS,FOXA2,ETS1
21:42790901:G:A	chr21	42790901	ETS,IRF,ETS1	rs79655468
21:42790901:G:T	chr21	42790901	ETS,ETS1	rs79655468
21:42790917:C:A	chr21	42790917	ETS,HNF1B
21:42790960:T:C	chr21	42790960	KLF16,PLAG1		-2.80914	0.0665525
21:42790990:T:C	chr21	42790990	ETS,TEAD,ETS1
21:42790999:C:T	chr21	42790999	PLAG1
21:42791064:C:T	chr21	42791064	CTCF,ETS,PLAG1		4.91905	9.8158e-05
21:42791074:C:T	chr21	42791074	ETS
21:42791103:T:C	chr21	42791103	HNF1B		-3.13224	0.0331173
21:42791109:A:T	chr21	42791109	TEAD1		4.38454	0.000809212
21:42791147:G:C	chr21	42791147	NKX3-1
21:42797601:G:A	chr21	42797601	NKX2-1
21:42797606:G:A	chr21	42797606	NKX2-1	rs462903	-3.80425	0.00555947
21:42797639:G:T	chr21	42797639	CEBP,STAT,CEBPB
21:42797647:G:C	chr21	42797647	PLAG1,IRF
21:42797650:G:GA	chr21	42797650	IRF
21:42797654:C:T	chr21	42797654	IRF
21:42797655:G:C	chr21	42797655	ETS,IRF3,IRF,ETS1
21:42797686:G:T	chr21	42797686	CTCF
21:42797697:G:A	chr21	42797697	CTCF
21:42797732:T:C	chr21	42797732	NKX1-1
21:42797792:C:T	chr21	42797792	PLAG1
21:42797981:CG:C	chr21	42797981	NF1
21:42798009:G:C	chr21	42798009	ETS,STAT
21:42798014:C:T	chr21	42798014	TFAP2,TFAP2A
21:42798029:G:A	chr21	42798029	KLF7
21:42798030:C:A	chr21	42798030	KLF7	rs17000900
21:42798065:G:T	chr21	42798065	IRF9,TFAP2C,TFAP2,IRF3,TFAP2B,IRF,TFAP2A	rs2071430
21:42798074:C:T	chr21	42798074	TFAP2C,TFAP2,TFAP2B,TFAP2A
21:42798075:G:A	chr21	42798075	TFAP2C,TFAP2,TFAP2B,TFAP2A
21:42798075:G:C	chr21	42798075	TFAP2		-3.43436	0.015715
21:42798112:G:A	chr21	42798112	TFAP2,TFAP2A
21:42798204:C:T	chr21	42798204	IRF2,IRF,IRF1,IRF4
21:42798219:A:G	chr21	42798219	RUNX3
21:42798257:A:G	chr21	42798257	RUNX3
21:42798260:G:C	chr21	42798260	RUNX3
21:42798261:G:A	chr21	42798261	RUNX3
21:42798284:T:C	chr21	42798284	TFAP2C,TFAP2,TFAP2A
21:42798322:C:T	chr21	42798322	HNF1
21:42798325:G:A	chr21	42798325	HNF1A,HNF1B,HNF1
21:42798345:T:C	chr21	42798345	MEF2
21:42798374:G:T	chr21	42798374	NFY,KLF12,KLF7,KLF4,KLF14
21:42798395:C:G	chr21	42798395	RUNX1,RUNX2
21:42798482:G:T	chr21	42798482	KLF16,KLF7,KLF4,KLF5
21:42798501:G:A	chr21	42798501	TFAP2C,TFAP2,TFAP2B,PLAG1,KLF7,TFAP2A
21:42798530:C:T	chr21	42798530	NKX3-2,NKX3-1
21:42798579:A:G	chr21	42798579	NF1
21:42798612:G:C	chr21	42798612	STAT,NKX2-1
21:42798619:A:AT	chr21	42798619	STAT1,STAT,STAT6
21:42798624:C:T	chr21	42798624	STAT1,STAT,STAT3,STAT6		-2.95151	0.0495533
21:42798627:G:A	chr21	42798627	STAT1,STAT,STAT3,STAT6,ETS1
21:42798634:G:A	chr21	42798634	STAT,IRF,IRF7
21:42798638:A:G	chr21	42798638	IRF2
21:42798640:G:A	chr21	42798640	IRF2
21:42798667:G:A	chr21	42798667	CTCF,PLAG1
21:42798759:C:G	chr21	42798759	RUNX2,RUNX3
21:42798771:T:TC	chr21	42798771	KLF16,PLAG1	rs3216793
21:42798771:T:TCC	chr21	42798771	PLAG1	rs3216793
21:42798775:C:CG	chr21	42798775	KLF16,PLAG1,KLF7,KLF4,KLF5,KLF14		3.34371	0.0198825
21:42798775:C:CT	chr21	42798775	KLF16,PLAG1
21:42798776:C:CG	chr21	42798776	KLF16,PLAG1,KLF7
21:42798777:C:CA	chr21	42798777	PLAG1,KLF7
21:42798778:C:CT	chr21	42798778	PLAG1
21:42798780:C:A	chr21	42798780	KLF16,PLAG1
21:42798780:C:T	chr21	42798780	PLAG1
21:42798812:C:T	chr21	42798812	TFAP2C,TFAP2
21:42798815:G:A	chr21	42798815	TFAP2C,TFAP2
21:42798824:G:T	chr21	42798824	TFAP2C
21:42798872:G:C	chr21	42798872	KLF4
21:42798880:G:A	chr21	42798880	KLF14
21:42798908:G:C	chr21	42798908	KLF16,KLF7,KLF4,KLF5
21:42798921:G:GC	chr21	42798921	TFAP2C,TFAP2,TFAP2B,TFAP2A		-2.59703	0.0999243
21:42798980:G:A	chr21	42798980	NF1
21:42799023:A:G	chr21	42799023	HNF1A,HNF1B,HNF1,FOS
21:42799028:A:T	chr21	42799028	HNF1
21:42799113:A:T	chr21	42799113	KLF13,MEF2A
21:42799141:C:T	chr21	42799141	RUNX2,RUNX3
21:42799145:G:A	chr21	42799145	RUNX2,RUNX3
21:42799150:C:G	chr21	42799150	RUNX2,RUNX3
21:42799151:G:A	chr21	42799151	RUNX2,RUNX3
21:42799154:C:T	chr21	42799154	TEAD4
21:42799178:C:A	chr21	42799178	KLF16,KLF12,KLF13,KLF14
21:42799178:C:T	chr21	42799178	KLF16,KLF12,KLF13,KLF14
21:42799181:G:A	chr21	42799181	KLF16,KLF12,KLF13,KLF14
21:42831687:G:A	chr21	42831687	NKX2-1
21:42831721:C:T	chr21	42831721	STAT1,STAT,STAT4,STAT5
21:42831737:G:T	chr21	42831737	ETS,KLF4
21:42831738:G:A	chr21	42831738	RUNX1,KLF4
21:42831757:C:A	chr21	42831757	STAT
21:42831760:G:A	chr21	42831760	STAT
21:42831776:G:C	chr21	42831776	KLF16
21:42831782:C:T	chr21	42831782	KLF16,KLF12,KLF7,KLF4,KLF14
21:42831783:G:A	chr21	42831783	KLF16
21:42831783:G:C	chr21	42831783	KLF16,PLAG1
21:42831804:G:A	chr21	42831804	HNF1A
21:42831883:C:T	chr21	42831883	KLF12
21:42831972:C:T	chr21	42831972	ETS1
21:42831973:G:A	chr21	42831973	HNF1B,STAT1
21:42832026:A:G	chr21	42832026	TFAP2C,TFAP2,TFAP2B,TFAP2A
21:42832052:C:T	chr21	42832052	TFAP2C,CEBPB
21:42832055:C:G	chr21	42832055	TFAP2C,CEBPB
21:42832066:A:G	chr21	42832066	IRF2,KLF4,IRF1
21:42832101:T:C	chr21	42832101	ETS,NKX2-8
21:42832112:G:A	chr21	42832112	CTCF
21:42832113:T:C	chr21	42832113	CTCF
21:42832121:C:T	chr21	42832121	CTCF,ETS1
21:42832128:G:A	chr21	42832128	CTCF
21:42832156:GGA:G	chr21	42832156	PLAG1
21:42832162:G:A	chr21	42832162	PLAG1		4.31774	0.00102454
21:42832164:G:A	chr21	42832164	PLAG1,NKX3-1	rs8127290	3.78623	0.00586692
21:42832182:G:A	chr21	42832182	CTCF
21:42832187:C:T	chr21	42832187	CTCF,TFAP2,TFAP2A
21:42832188:G:A	chr21	42832188	CTCF,TFAP2,TFAP2A
21:42832229:TG:T	chr21	42832229	ETS,NF1		4.25332	0.00128833
21:42832270:G:C	chr21	42832270	KLF16,KLF7,KLF4
21:42832273:G:A	chr21	42832273	KLF16,KLF7,KLF4
21:42832311:G:A	chr21	42832311	KLF12,PLAG1,KLF7,KLF13,KLF14
21:42832316:C:T	chr21	42832316	KLF4,KLF5,KLF14,KLF16,KLF12,PLAG1,KLF7,KLF13		-3.521	0.0124833
21:42832317:G:A	chr21	42832317	KLF16,KLF12,KLF7,KLF4,KLF13,KLF5,KLF14
21:42832317:G:GC	chr21	42832317	KLF16,KLF12,KLF7,KLF4,KLF13,KLF5,KLF14
21:42832317:GC:G	chr21	42832317	KLF16,KLF12,KLF7,KLF4,KLF13,KLF5,KLF14
21:42832322:C:A	chr21	42832322	KLF16,KLF12,KLF7,KLF13,KLF14
21:42832324:C:A	chr21	42832324	KLF12,KLF7,KLF13
21:42832371:T:G	chr21	42832371	IRF
21:42832373:G:A	chr21	42832373	ETS
21:42832399:A:G	chr21	42832399	ETS,ETS1
21:42832410:G:A	chr21	42832410	ETS
21:42832435:C:T	chr21	42832435	CEBPA,CEBPB
21:42832451:C:T	chr21	42832451	TFAP2,TFAP2A
21:42832452:G:A	chr21	42832452	TFAP2,TFAP2A
21:42832452:G:T	chr21	42832452	TFAP2C,TFAP2,TFAP2B,TFAP2A
21:42832468:ATG:A	chr21	42832468	CTCF
21:42832469:T:C	chr21	42832469	CTCF	rs1548707
21:42832472:T:C	chr21	42832472	CTCF
21:42832474:C:T	chr21	42832474	CTCF,NKX2-1
21:42832541:C:T	chr21	42832541	FOS	rs1557372	-5.13015	4.0135e-05
21:42832545:T:C	chr21	42832545	FOS
21:42832724:G:A	chr21	42832724	CTCF		-5.11585	4.28069e-05
21:42832726:G:A	chr21	42832726	CTCF		-5.63209	3.83758e-06
21:42832730:G:A	chr21	42832730	CTCF,CEBP
21:42832741:C:T	chr21	42832741	CEBPD
21:42832769:C:T	chr21	42832769	KLF4
21:42832780:CA:C	chr21	42832780	NFY
21:42832818:G:A	chr21	42832818	ETS,ETS1
21:42832828:G:A	chr21	42832828	ETS
21:42832851:C:A	chr21	42832851	CEBP,CEBPB
21:42832852:A:C	chr21	42832852	CEBP
21:42832907:G:A	chr21	42832907	ETS,IRF3
21:42833013:G:T	chr21	42833013	IRF,NF1
21:42833019:A:G	chr21	42833019	IRF,NF1
21:42833025:A:G	chr21	42833025	RUNX2,NF1
21:42833026:T:C	chr21	42833026	NF1
21:42833040:C:G	chr21	42833040	TFAP2C,TFAP2,TFAP2B,TFAP2A
21:42833070:C:T	chr21	42833070	TFAP2,TFAP2B,TFAP2A,KLF13
21:42833071:G:A	chr21	42833071	TFAP2,TFAP2B,TFAP2A,KLF13
21:42833078:G:A	chr21	42833078	CTCF,TFAP2,ETS,KLF4,KLF5,KLF14,STAT,KLF16,KLF12,TFAP2B,KLF7,TFAP2A,KLF13
21:42833090:C:T	chr21	42833090	TFAP2C,TFAP2,RUNX2,TFAP2B,TFAP2A,RUNX3
21:42833091:G:A	chr21	42833091	TFAP2C,TFAP2,RUNX2,TFAP2B,TFAP2A,RUNX3
21:42833109:G:A	chr21	42833109	TLX,NF1		-3.06354	0.0387661
21:42833118:A:G	chr21	42833118	TFAP2C,TFAP2,TFAP2B,TFAP2A
21:42833126:G:A	chr21	42833126	NKX3-1
21:42833168:A:C	chr21	42833168	CTCF
21:42833196:C:A	chr21	42833196	KLF16
21:42833197:C:T	chr21	42833197	KLF16
21:42833227:T:C	chr21	42833227	ETS,ETS1
21:42833231:A:C	chr21	42833231	KLF4
21:42833235:C:T	chr21	42833235	KLF4
21:42833238:C:T	chr21	42833238	KLF4
21:42833247:C:T	chr21	42833247	RUNX2,RUNX3
21:42833248:G:C	chr21	42833248	STAT,RUNX2,RUNX3
21:42833254:C:G	chr21	42833254	STAT,RUNX2,RUNX3
21:42833254:C:T	chr21	42833254	RUNX1,STAT,RUNX2,RUNX3
21:42833255:G:A	chr21	42833255	STAT,RUNX2,RUNX3
21:42833287:G:A	chr21	42833287	IRF7
21:42833290:T:A	chr21	42833290	STAT1,IRF,IRF7
21:42833364:G:A	chr21	42833364	TLX,NF1
21:42833399:C:T	chr21	42833399	FOXA2,FOXA,FOXA1
21:42833415:C:G	chr21	42833415	CEBP
21:42833426:A:G	chr21	42833426	CEBP,NFY
21:42833435:C:G	chr21	42833435	CTCF		-3.29507	0.0224761
21:42833453:C:A	chr21	42833453	MEF2
21:42833488:A:G	chr21	42833488	TFAP2C,TFAP2,TFAP2B,TFAP2A
21:42833494:G:A	chr21	42833494	TFAP2C,TFAP2A
21:42833498:C:T	chr21	42833498	CTCF,TFAP2C,KLF16,KLF14
21:42833499:G:A	chr21	42833499	CTCF,KLF4,KLF5,KLF14,KLF16,KLF12,KLF7,KLF13
21:42833513:G:A	chr21	42833513	CTCF,RUNX1,RUNX,RUNX2		-4.28018	0.00117321
21:42833519:AC:A	chr21	42833519	IRF8,IRF2,STAT1,ISRE,IRF3,IRF4,FOXA1,IRF9,IRF1,IRF,IRF7	rs35074065	-3.11959	0.0340988
21:42833546:T:C	chr21	42833546	OSR2
21:42833549:T:C	chr21	42833549	CEBP
21:42833581:T:C	chr21	42833581	NF1,FOXA1
21:42833585:G:A	chr21	42833585	NF1
21:42849701:C:T	chr21	42849701	TFAP2C,NF1
21:42849702:G:A	chr21	42849702	TFAP2C
21:42849734:G:A	chr21	42849734	OSR2
21:42849734:G:C	chr21	42849734	OSR2
21:42849783:G:C	chr21	42849783	FOXA1
21:42849801:C:G	chr21	42849801	ETS		-2.85195	0.0610238
21:42849802:G:A	chr21	42849802	CTCF,KLF16
21:42849806:C:T	chr21	42849806	KLF4
21:42849812:A:C	chr21	42849812	KLF16
21:42849814:C:A	chr21	42849814	RUNX3
21:42849815:A:T	chr21	42849815	KLF16
21:42849823:C:T	chr21	42849823	NFY
21:42849909:C:A	chr21	42849909	NKX2-2,NKX2-4,NF1
21:42849917:C:T	chr21	42849917	CTCF,ETS,ETS1
21:42849918:G:A	chr21	42849918	ETS,ETS1
21:42849918:G:C	chr21	42849918	ETS,ETS1
21:42849928:C:T	chr21	42849928	ETS,KLF7,ETS1
21:42849935:T:A	chr21	42849935	KLF16,KLF7,KLF4,KLF5
21:42849936:C:T	chr21	42849936	KLF16,KLF7
21:42849941:C:G	chr21	42849941	KLF7
21:42849941:C:T	chr21	42849941	KLF7
21:42849942:G:A	chr21	42849942	KLF7
21:42849958:A:C	chr21	42849958	TFAP2C,TFAP2,TFAP2B,TFAP2A
21:42849975:C:T	chr21	42849975	HNF1B
21:42849976:G:A	chr21	42849976	HNF1B
21:42850038:T:G	chr21	42850038	RUNX
21:42850053:G:C	chr21	42850053	RUNX2,RUNX3
21:42850060:C:T	chr21	42850060	RUNX1,RUNX,RUNX2,RUNX3
21:42850093:C:T	chr21	42850093	CTCF
21:42850094:G:A	chr21	42850094	CTCF
21:42850106:C:G	chr21	42850106	CTCF,TFAP2C,TFAP2,KLF16,TFAP2B,TFAP2A
21:42850110:A:C	chr21	42850110	TFAP2C,TFAP2,KLF16,TFAP2B,TFAP2A
21:42850153:T:G	chr21	42850153	STAT
21:42850184:C:T	chr21	42850184	PLAG1
21:42850188:C:T	chr21	42850188	STAT1,STAT,STAT4,STAT3,STAT5
21:42850204:C:G	chr21	42850204	TFAP2
21:42850214:C:T	chr21	42850214	TFAP2C,TFAP2,TFAP2B,TFAP2A		-3.48654	0.0137008
21:42850238:C:T	chr21	42850238	KLF16
21:42850239:G:A	chr21	42850239	CTCF
21:42850258:C:T	chr21	42850258	STAT1,STAT,STAT3
21:42850262:C:G	chr21	42850262	ETS,STAT,STAT3,ETS1
21:42850262:C:T	chr21	42850262	STAT
21:42850263:G:A	chr21	42850263	STAT
21:42850419:G:C	chr21	42850419	FOXA1		-3.02498	0.0422319
21:42850453:G:A	chr21	42850453	IRF2,IRF,KLF4
21:42850455:G:C	chr21	42850455	IRF2		-3.58742	0.0104094
21:42850515:T:C	chr21	42850515	RUNX1,RUNX,RUNX2,RUNX3
21:42850526:C:T	chr21	42850526	STAT
21:42850542:A:C	chr21	42850542	NF1		2.93078	0.0517865
21:42850631:C:T	chr21	42850631	PLAG1
21:42850680:C:G	chr21	42850680	CEBPB
21:42850694:C:T	chr21	42850694	STAT4,STAT3		2.66115	0.0887733
21:42850759:G:A	chr21	42850759	STAT1,STAT,STAT3,KLF7,STAT5
21:42850765:C:T	chr21	42850765	KLF16,KLF12,KLF7,KLF4,KLF5		-2.866	0.0593037
21:42850766:G:A	chr21	42850766	ETS,KLF16,KLF12,KLF7,KLF4,KLF5
21:42850770:T:C	chr21	42850770	KLF4,KLF5,KLF14,STAT,KLF16,KLF12,KLF7,KLF13
21:42850809:G:C	chr21	42850809	STAT1,IRF,KLF4,ETS1
21:42850833:G:A	chr21	42850833	CEBP
21:42850852:G:A	chr21	42850852	CEBP
21:42850879:C:T	chr21	42850879	IRF8,IRF,IRF7
21:42850882:A:T	chr21	42850882	IRF8,IRF,IRF1,IRF7	rs73372191
21:42850911:C:T	chr21	42850911	ETS,STAT,STAT6,ETS1	rs9974995	-3.5626	0.0111454
21:42850916:T:A	chr21	42850916	ETS,STAT6,ETS1
21:42850916:T:C	chr21	42850916	ETS,STAT,STAT6,ETS1
21:42850978:T:A	chr21	42850978	IRF2,IRF,IRF1,IRF7
21:42850997:G:A	chr21	42850997	CTCF
21:42851006:A:G	chr21	42851006	CEBP	rs9975014
21:42851034:G:A	chr21	42851034	STAT
21:42851045:G:A	chr21	42851045	ETS
21:42857470:G:C	chr21	42857470	NKX2-1
21:42857557:C:T	chr21	42857557	CEBP
21:42857558:A:G	chr21	42857558	CEBP
21:42857559:G:A	chr21	42857559	CEBP,IRF8,IRF2,STAT1,ISRE,IRF,IRF1,IRF7		4.22445	0.00142176
21:42857568:C:T	chr21	42857568	IRF4	rs11702475
21:42857579:G:GA	chr21	42857579	RUNX1,STAT3
21:42857579:G:GAA	chr21	42857579	RUNX1,STAT3
21:42857579:GA:G	chr21	42857579	RUNX1,STAT3
21:42857579:GAA:G	chr21	42857579	RUNX1,STAT3
21:42857581:A:G	chr21	42857581	RUNX1,STAT3
21:42857582:A:G	chr21	42857582	RUNX1,STAT3
21:42857589:A:G	chr21	42857589	RUNX1		-3.87102	0.00453392
21:42857595:AT:A	chr21	42857595	RUNX1,STAT1,ISRE,IRF,IRF1
21:42857617:T:C	chr21	42857617	NKX2-5,IRF2,NKX2-4,NKX2-1
21:42857641:G:A	chr21	42857641	CEBP,CEBPA,CEBPB
21:42857642:C:T	chr21	42857642	CEBP,CEBPA
21:42857653:C:T	chr21	42857653	CEBPA,KLF13
21:42857686:A:T	chr21	42857686	MEF2,MEF2B,MEF2C,MEF2A
21:42857705:A:C	chr21	42857705	MEF2		-3.29194	0.0226534
21:42857705:A:G	chr21	42857705	MEF2
21:42857720:C:T	chr21	42857720	NKX2-2
21:42857722:T:C	chr21	42857722	NKX2-2,NKX2-4
21:42857750:G:A	chr21	42857750	STAT1,STAT,STAT4,STAT3,STAT5
21:42857755:A:G	chr21	42857755	STAT
21:42857784:C:T	chr21	42857784	FOXA1		-2.89576	0.0557492
21:42857785:G:A	chr21	42857785	FOXA1
21:42857846:A:T	chr21	42857846	STAT1,STAT,STAT3		3.67087	0.00820865
21:42857891:A:T	chr21	42857891	ETS,ETS1
21:42857897:G:C	chr21	42857897	ETS,KLF16,KLF12,KLF7,KLF4		3.63307	0.00914942
21:42857901:C:T	chr21	42857901	ETS,ETS1	rs62217531
21:42857920:G:A	chr21	42857920	KLF4
21:42857925:G:A	chr21	42857925	KLF4
21:42857954:T:G	chr21	42857954	RUNX1,RUNX
21:42857981:G:A	chr21	42857981	RUNX2,RUNX3	rs2298857
21:42857997:A:T	chr21	42857997	STAT6
21:42857998:G:T	chr21	42857998	MEF2,STAT6
21:42857999:A:G	chr21	42857999	STAT6
21:42858025:T:C	chr21	42858025	NKX2-3,KLF7,NKX2-8,NKX2-1		-4.08677	0.00227371
21:42858066:G:T	chr21	42858066	STAT1,STAT,STAT3
21:42858096:A:T	chr21	42858096	STAT1,ISRE,MEF2B,MEF2A,MEF2D,MEF2,IRF1,MEF2C		-2.76331	0.07294
21:42858101:T:A	chr21	42858101	MEF2D,MEF2,MEF2B,MEF2C,MEF2A
21:42858127:A:G	chr21	42858127	FOXA2,FOXA,FOXA1
21:42858172:C:T	chr21	42858172	TEAD1
21:42858217:C:G	chr21	42858217	RUNX1,RUNX,RUNX2,RUNX3
21:42858229:CT:C	chr21	42858229	RUNX1
21:42858287:C:T	chr21	42858287	CEBP,CEBPD,CEBPA,CEBPB,CEBPE,CEBPG		-6.96801	1.75907e-09
21:42858288:G:A	chr21	42858288	CEBP,CEBPD,CEBPA,CEBPB,CEBPE,CEBPG		-14.5333	9.99593e-44
21:42858295:C:T	chr21	42858295	CEBPA		3.19033	0.0288632
21:42858311:C:A	chr21	42858311	KLF16
21:42858312:C:G	chr21	42858312	KLF16
21:42858315:C:T	chr21	42858315	KLF16		-5.59858	4.53758e-06
21:42858321:G:A	chr21	42858321	NKX2-4,NKX2-1
21:42858352:G:A	chr21	42858352	NKX2-1
21:42858373:C:T	chr21	42858373	CTCF
21:42858384:G:A	chr21	42858384	ETS		-3.75606	0.00641616
21:42858394:T:G	chr21	42858394	IRF
21:42858408:G:C	chr21	42858408	MEF2D,MEF2B,MEF2C,MEF2A
21:42858426:C:T	chr21	42858426	IRF,IRF1,IRF4
21:42858441:G:T	chr21	42858441	TEAD1,TEAD3
21:42858454:T:C	chr21	42858454	TEAD		-2.72795	0.0781448
21:42858461:G:C	chr21	42858461	KLF13
21:42858468:G:A	chr21	42858468	KLF16,KLF13,KLF14
21:42858476:C:T	chr21	42858476	PLAG1,KLF13
21:42858477:G:A	chr21	42858477	PLAG1,KLF13
21:42858488:G:T	chr21	42858488	TEAD1
21:42858510:C:G	chr21	42858510	TFAP2C,ETS,ETS1
21:42858517:G:A	chr21	42858517	ETS,ETS1
21:42858520:C:T	chr21	42858520	ETS
21:42858521:G:A	chr21	42858521	ETS,STAT3
21:42858552:GA:G	chr21	42858552	ETS,IRF2,IRF,IRF1,IRF7
21:42858569:T:G	chr21	42858569	IRF2
21:42863320:C:A	chr21	42863320	TFAP2C,TFAP2	rs35899679
21:42863321:G:A	chr21	42863321	TFAP2C,TFAP2,NKX3-2,TFAP2A
21:42863325:C:T	chr21	42863325	TFAP2C,TFAP2,TFAP2A
21:42863326:A:G	chr21	42863326	NKX2-5,TFAP2C,TFAP2,TFAP2A	rs417888
21:42863334:A:G	chr21	42863334	NKX2-5
21:42863372:C:A	chr21	42863372	IRF3
21:42863475:T:G	chr21	42863475	RUNX1
21:42863532:T:C	chr21	42863532	PLAG1
21:42863553:C:T	chr21	42863553	TEAD1
21:42863556:T:C	chr21	42863556	ETS,TEAD1
21:42863560:C:T	chr21	42863560	TEAD1
21:42863563:C:T	chr21	42863563	TEAD1
21:42863564:G:A	chr21	42863564	TEAD1		-2.64148	0.0920769
21:42863577:C:A	chr21	42863577	STAT
21:42863600:A:G	chr21	42863600	RUNX1
21:42863704:G:A	chr21	42863704	ETS,STAT,ETS1
21:42863704:G:T	chr21	42863704	STAT
21:42863732:C:T	chr21	42863732	ETS1
21:42863749:C:T	chr21	42863749	KLF12
21:42863750:G:A	chr21	42863750	KLF12	rs73357642
21:42863751:C:T	chr21	42863751	RUNX,RUNX2,KLF12
21:42863752:G:A	chr21	42863752	KLF12
21:42863779:T:C	chr21	42863779	PLAG1	rs391099
21:42863780:G:A	chr21	42863780	RUNX1
21:42863808:T:C	chr21	42863808	NKX6-1,NKX6-2
21:42863827:C:T	chr21	42863827	OSR2,TLX	rs73357644
21:42863828:G:A	chr21	42863828	OSR2
21:42933995:T:TA	chr21	42933995	FOXA1
21:42933995:T:TAA	chr21	42933995	FOXA1
21:42933995:TA:T	chr21	42933995	FOXA1	rs201976715
21:42933996:A:T	chr21	42933996	FOXA1
21:42934003:A:T	chr21	42934003	IRF2,IRF3,IRF,IRF1,IRF7,FOXA1
21:42934007:T:A	chr21	42934007	IRF8,IRF2,STAT1,IRF3,FOXA1,IRF9,RUNX1,IRF1,IRF,IRF7
21:42934010:A:G	chr21	42934010	IRF8,IRF2,IRF3,FOXA1,IRF9,IRF,IRF1,IRF7
21:42934016:A:G	chr21	42934016	IRF8,IRF2,IRF3,IRF9,RUNX1,IRF,IRF1,IRF7		-2.61373	0.096924
21:42934016:A:T	chr21	42934016	IRF8,IRF9,IRF2,IRF3,IRF,IRF1,IRF7
21:42934049:C:T	chr21	42934049	TFAP2C,TFAP2
21:42934052:C:T	chr21	42934052	TFAP2C,TFAP2
21:42934055:G:T	chr21	42934055	TFAP2C,TFAP2
21:42934062:C:T	chr21	42934062	TFAP2C,TFAP2,TFAP2B,TFAP2A
21:42934090:C:T	chr21	42934090	TLX,NF1
21:42934100:C:G	chr21	42934100	TFAP2
21:42934103:C:T	chr21	42934103	TFAP2,TFAP2B,TFAP2A
21:42934105:G:A	chr21	42934105	TFAP2,TFAP2B,TFAP2A
21:42934109:G:A	chr21	42934109	TFAP2,TFAP2B,TFAP2A
21:42934127:G:C	chr21	42934127	ETS,ETS1
21:42934138:G:C	chr21	42934138	STAT3
21:42934158:C:T	chr21	42934158	TLX
21:42934185:T:C	chr21	42934185	CTCF,NKX2-5,NKX3-2
21:42934192:G:T	chr21	42934192	CTCF,NKX2-5,NKX3-2
21:42934194:C:T	chr21	42934194	CTCF,NKX2-5,NKX3-1
21:42934195:G:A	chr21	42934195	CTCF
21:42934216:C:T	chr21	42934216	RUNX1,RUNX,RUNX2,RUNX3
21:42934217:G:C	chr21	42934217	RUNX,RUNX3
21:42934224:C:A	chr21	42934224	CTCF
21:42934250:C:T	chr21	42934250	RUNX1
21:42934267:C:T	chr21	42934267	PLAG1
21:42934268:G:A	chr21	42934268	STAT3,PLAG1
21:42934269:G:A	chr21	42934269	STAT3,PLAG1
21:42934276:A:C	chr21	42934276	STAT3
21:42934288:T:C	chr21	42934288	TFAP2C
21:42934338:C:T	chr21	42934338	KLF12,KLF4,KLF5
21:42934347:G:A	chr21	42934347	ETS,ETS1		-3.07242	0.0379962
21:42934349:A:G	chr21	42934349	ETS,ETS1		-3.59941	0.0100619
21:42934356:C:T	chr21	42934356	ETS,ETS1
21:42934357:C:T	chr21	42934357	ETS,ETS1
21:42934407:G:C	chr21	42934407	PLAG1,KLF14
21:42934455:C:T	chr21	42934455	TFAP2C,TFAP2,TFAP2B,TFAP2A
21:42934456:G:A	chr21	42934456	TFAP2C,TFAP2,TFAP2B,TFAP2A
21:42934460:G:A	chr21	42934460	TFAP2C,TFAP2,TFAP2B,TFAP2A
21:42934479:C:T	chr21	42934479	CTCF
21:42934485:C:A	chr21	42934485	CTCF
21:42934486:T:G	chr21	42934486	CTCF
21:42934492:C:T	chr21	42934492	CTCF
21:42934493:G:A	chr21	42934493	CTCF,TFAP2,ETS
21:42934515:C:T	chr21	42934515	KLF12,NF1
21:42934516:G:A	chr21	42934516	KLF12,KLF4
21:42934554:C:T	chr21	42934554	ETS,IRF,IRF1
21:42934562:C:T	chr21	42934562	CTCF,ETS,KLF4
21:42934581:C:T	chr21	42934581	MEF2D,NKX2-2,MEF2,NKX2-4,MEF2B,MEF2C,MEF2A		2.67696	0.0861675
21:42934615:C:T	chr21	42934615	ETS
21:42936826:A:C	chr21	42936826	NKX2-5,NKX6-1
21:42936830:G:A	chr21	42936830	NKX2-5,NKX6-1
21:42936834:C:A	chr21	42936834	NKX6-1
21:42936840:T:C	chr21	42936840	ETS,ETS1
21:42936841:G:T	chr21	42936841	ETS,ETS1
21:42936844:G:A	chr21	42936844	ETS,STAT,ETS1
21:42936859:C:T	chr21	42936859	CTCF,TEAD1,TEAD3
21:42936865:C:T	chr21	42936865	CEBPB
21:42936866:G:C	chr21	42936866	STAT,KLF16
21:42936882:C:T	chr21	42936882	ETS		-4.08355	0.0022975
21:42936887:C:T	chr21	42936887	ETS
21:42936896:C:T	chr21	42936896	TEAD,TEAD1,TEAD4,TEAD3
21:42936897:G:A	chr21	42936897	TEAD4
21:42936912:C:T	chr21	42936912	IRF2,ISRE,IRF
21:42936913:G:A	chr21	42936913	IRF8,IRF9,IRF2,IRF5,IRF
21:42936920:T:C	chr21	42936920	CTCF,IRF8,IRF2,IRF5,RUNX2,OSR2,IRF9,IRF
21:42936925:G:A	chr21	42936925	CTCF,IRF8,IRF9,RUNX,RUNX2,IRF5,IRF
21:42936949:T:A	chr21	42936949	Jun-AP1,FOS		-7.2095	3.65386e-10
21:42936960:G:A	chr21	42936960	IRF2
21:42937009:T:C	chr21	42937009	CEBPA		-4.31971	0.00101716
21:42937017:C:CT	chr21	42937017	CEBPA,FOXA1
21:42937017:C:CTT	chr21	42937017	CEBPA,FOXA1	rs530603120
21:42937021:T:TA	chr21	42937021	MEF2C,IRF7,FOXA1
21:42937023:T:G	chr21	42937023	FOXA,FOXA1
21:42937023:T:TG	chr21	42937023	FOXA,FOXA1
21:42937036:T:C	chr21	42937036	IRF9,IRF3,IRF,IRF1,IRF7,FOXA,FOXA1
21:42937038:G:A	chr21	42937038	IRF9,IRF,IRF1,IRF7
21:42937038:G:GT	chr21	42937038	IRF9,IRF,IRF1,IRF7
21:42937039:T:G	chr21	42937039	IRF8,IRF9,MEF2,ISRE,IRF,IRF1,IRF7
21:42937081:T:C	chr21	42937081	NKX2-5,NFY,NKX3-2,TLX
21:42937198:A:G	chr21	42937198	FOXA2,FOXA
21:42937200:C:A	chr21	42937200	FOXA2,FOXA
21:42937213:G:A	chr21	42937213	TEAD1,TEAD3
21:42937214:T:C	chr21	42937214	KLF13
21:42937256:C:T	chr21	42937256	ETS,STAT1,STAT,STAT3,ETS1		-3.35552	0.0192932
21:42937267:AT:A	chr21	42937267	ETS
21:43018829:C:T	chr21	43018829	ETS
21:43018872:C:T	chr21	43018872	CTCF
21:43018944:C:T	chr21	43018944	KLF7
21:43018945:G:A	chr21	43018945	KLF12,KLF7
21:43018951:G:A	chr21	43018951	KLF16,KLF12,KLF7
21:43018956:C:A	chr21	43018956	ETS,KLF16,KLF12,KLF7,KLF4,KLF5
21:43019020:C:G	chr21	43019020	IRF8,STAT,IRF,IRF4
21:43019020:C:T	chr21	43019020	STAT
21:43019021:G:A	chr21	43019021	STAT
21:43019043:C:T	chr21	43019043	RUNX2,RUNX3
21:43019044:G:A	chr21	43019044	RUNX2,RUNX3
21:43019051:G:T	chr21	43019051	RUNX2,RUNX3
21:43019063:CCG:C	chr21	43019063	CTCF
21:43019108:C:T	chr21	43019108	TLX,NF1
21:43019109:G:A	chr21	43019109	TLX,NF1
21:43019116:C:G	chr21	43019116	NF1
21:43019121:C:G	chr21	43019121	CTCF
21:43019158:T:TG	chr21	43019158	TFAP2C,TFAP2,TFAP2B,TFAP2A
21:43019159:G:C	chr21	43019159	TFAP2C,TFAP2,TFAP2B,TFAP2A
21:43019164:A:G	chr21	43019164	TFAP2C,TFAP2,TFAP2B,TFAP2A
21:43019167:G:T	chr21	43019167	KLF4
21:43019174:C:T	chr21	43019174	KLF4,RUNX3
21:43019175:G:A	chr21	43019175	KLF4,RUNX3
21:43019183:C:T	chr21	43019183	RUNX3
21:43019184:G:A	chr21	43019184	RUNX3
21:43019186:C:G	chr21	43019186	RUNX3
21:43019186:C:T	chr21	43019186	RUNX3
21:43019199:A:G	chr21	43019199	NKX2-1
21:43019266:C:CAA	chr21	43019266	ISRE
21:43019298:C:T	chr21	43019298	ETS
21:43019299:G:A	chr21	43019299	ETS
21:43019354:T:C	chr21	43019354	CEBPB,KLF4
21:43019362:G:A	chr21	43019362	CEBPB,KLF4
21:43019380:C:T	chr21	43019380	PLAG1
21:43019381:G:A	chr21	43019381	PLAG1
21:43019382:C:A	chr21	43019382	PLAG1
21:43019384:C:T	chr21	43019384	PLAG1,NKX2-1,NF1
21:43019385:G:A	chr21	43019385	PLAG1,NKX2-1
21:43019385:G:C	chr21	43019385	PLAG1
21:43019392:C:T	chr21	43019392	NF1		3.1156	0.0344157
21:43019420:C:T	chr21	43019420	ETS,ETS1
21:43019438:G:A	chr21	43019438	CEBPA,CEBPB,FOXA	rs11203152
21:43019448:C:T	chr21	43019448	RUNX1
21:43019449:G:A	chr21	43019449	RUNX1,RUNX2,NF1
21:43019456:G:C	chr21	43019456	RUNX1,RUNX,RUNX2,RUNX3
21:43019478:G:A	chr21	43019478	ETS
21:43019517:G:A	chr21	43019517	NKX2-1
21:43019546:T:G	chr21	43019546	NF1
21:43019547:T:C	chr21	43019547	CEBPD
21:43019598:G:T	chr21	43019598	PLAG1
21:43019632:G:T	chr21	43019632	KLF7
21:43019633:T:C	chr21	43019633	KLF7		3.06607	0.0385464
21:43019666:A:T	chr21	43019666	CTCF	rs4919936
21:43019687:G:A	chr21	43019687	KLF16,KLF12,KLF7,KLF4,KLF5,KLF14
21:43019687:G:T	chr21	43019687	KLF16,KLF12,KLF7,KLF4,KLF5,KLF14		-4.20702	0.00151186
21:43019689:G:T	chr21	43019689	KLF16,KLF12,KLF7,KLF4,KLF5,KLF14
21:43019693:C:A	chr21	43019693	KLF7
21:43019693:C:T	chr21	43019693	KLF7
21:43019694:G:A	chr21	43019694	KLF7
21:43019720:C:T	chr21	43019720	KLF16,KLF7,KLF4,KLF13,KLF5,KLF14
21:43019721:G:A	chr21	43019721	ETS,KLF16,KLF7,KLF4,KLF13,KLF5,KLF14
21:43019725:C:G	chr21	43019725	ETS,KLF4,KLF5,KLF14,ETS1,KLF16,KLF7,KLF13	rs112815941
21:43019725:C:T	chr21	43019725	KLF16,KLF7,KLF4,KLF13,KLF5,KLF14,ETS1	rs112815941
21:43019729:C:G	chr21	43019729	RUNX2,ETS1	rs117842448
21:43019731:T:A	chr21	43019731	ETS1
21:43019759:C:T	chr21	43019759	IRF2
21:43019785:T:C	chr21	43019785	MEF2,KLF13
21:43019786:G:A	chr21	43019786	MEF2D,MEF2,MEF2B,KLF13,MEF2C,MEF2A
21:43019806:A:T	chr21	43019806	NKX3-1		-3.07488	0.0377842
21:43030378:A:G	chr21	43030378	KLF4
21:43030380:G:A	chr21	43030380	KLF4
21:43030404:CCT:C	chr21	43030404	TFAP2C,TFAP2
21:43030417:G:A	chr21	43030417	TFAP2C
21:43030440:C:T	chr21	43030440	CEBPB
21:43030459:C:T	chr21	43030459	CTCF
21:43030460:G:A	chr21	43030460	CTCF,NFY		2.68082	0.0855371
21:43030513:G:A	chr21	43030513	CEBPA
21:43030515:C:T	chr21	43030515	CEBP,CEBPA,CEBPD,CEBPB,CEBPE,CEBPG
21:43030520:C:T	chr21	43030520	CEBPA
21:43030522:A:G	chr21	43030522	CEBPA
21:43030529:T:C	chr21	43030529	ETS,NKX3-1
21:43030536:C:T	chr21	43030536	ETS
21:43030571:C:T	chr21	43030571	NKX2-2,NKX2-4,NKX2-6,NKX2-1
21:43030623:A:G	chr21	43030623	HNF1B,HNF1
21:43030639:G:A	chr21	43030639	CTCF		-2.79632	0.0683028
21:43030644:G:A	chr21	43030644	CTCF	rs7278918
21:43030654:C:T	chr21	43030654	NFY
21:43030658:G:A	chr21	43030658	STAT1,STAT,STAT3
21:43030662:G:T	chr21	43030662	STAT1,STAT,STAT4,STAT3,STAT5
21:43030672:A:G	chr21	43030672	STAT1,STAT,STAT3
21:43030674:G:A	chr21	43030674	ETS
21:43030684:G:A	chr21	43030684	IRF
21:43030716:C:G	chr21	43030716	CTCF,TFAP2,TFAP2B,TFAP2A		-4.50562	0.000517954
21:43030753:C:T	chr21	43030753	PLAG1
21:43030757:G:A	chr21	43030757	PLAG1
21:43030763:C:G	chr21	43030763	PLAG1	rs62219349	-3.16154	0.0309223
21:43030763:C:T	chr21	43030763	PLAG1	rs62219349
21:43030828:G:C	chr21	43030828	PLAG1
21:43030831:C:T	chr21	43030831	KLF16,PLAG1
21:43030886:A:G	chr21	43030886	ETS,ETS1,TEAD3
21:43030966:C:A	chr21	43030966	STAT1,TEAD,TEAD1,TEAD4,TEAD3
21:43030967:G:A	chr21	43030967	TEAD1,TEAD4
21:43031030:A:G	chr21	43031030	IRF8,STAT1,ISRE,IRF,IRF1,IRF7
21:43031042:C:T	chr21	43031042	KLF4
21:43031048:C:T	chr21	43031048	KLF7,KLF4,KLF5
21:43031087:G:A	chr21	43031087	PLAG1
21:43031092:G:T	chr21	43031092	TFAP2C
21:43098405:G:A	chr21	43098405	CTCF
21:43098433:G:A	chr21	43098433	KLF16		2.77711	0.0709598
21:43098438:G:A	chr21	43098438	KLF16		-3.42325	0.0161739
21:43098488:C:T	chr21	43098488	TEAD4
21:43098517:G:A	chr21	43098517	KLF16
21:43098548:T:G	chr21	43098548	STAT,TEAD3
21:43098561:C:T	chr21	43098561	TEAD,TEAD4		-3.0139	0.0432824
21:43098608:T:C	chr21	43098608	TEAD1
21:43098621:C:T	chr21	43098621	RUNX1
21:43098629:A:T	chr21	43098629	FOXA1
21:43098639:G:A	chr21	43098639	ETS
21:43098667:T:A	chr21	43098667	NF1
21:43098683:A:G	chr21	43098683	HNF1,MEF2
21:43098723:A:G	chr21	43098723	CTCF
21:43098727:G:A	chr21	43098727	CTCF,NFY		-2.87899	0.0577401
21:43098732:A:G	chr21	43098732	CTCF
21:43098793:T:G	chr21	43098793	CTCF,ETS,ETS1
21:43098808:G:C	chr21	43098808	ETS,KLF4,ETS1		2.60145	0.0991169
21:43098862:C:T	chr21	43098862	ETS,IRF3,IRF
21:43098889:T:C	chr21	43098889	TFAP2C,TFAP2,TFAP2B,PLAG1,TFAP2A		3.31285	0.0214998
21:43098894:G:A	chr21	43098894	TFAP2C,TFAP2,RUNX2,TFAP2B,PLAG1,TFAP2A
21:43098902:G:A	chr21	43098902	RUNX1,RUNX2
21:43098956:C:T	chr21	43098956	TFAP2C,TFAP2,TFAP2B,TFAP2A,NF1
21:43098980:G:A	chr21	43098980	TFAP2C,TFAP2,TFAP2B,TFAP2A,NKX2-1
21:43099048:T:A	chr21	43099048	CTCF
21:43099052:G:A	chr21	43099052	CTCF
21:43099052:G:C	chr21	43099052	CTCF
21:43099055:G:T	chr21	43099055	CTCF,NFY
21:43099088:T:G	chr21	43099088	IRF8,IRF9,STAT1,ISRE,IRF3,IRF
21:43099094:T:C	chr21	43099094	IRF9,STAT1,ISRE,IRF3,IRF
21:43099110:T:C	chr21	43099110	TFAP2C,TFAP2,TFAP2A
21:43099142:G:T	chr21	43099142	FOXA1
21:43099153:T:C	chr21	43099153	FOXA1
21:43099166:C:G	chr21	43099166	CEBP,RUNX1
21:43099199:G:A	chr21	43099199	KLF14
21:43099209:C:T	chr21	43099209	KLF16,KLF14
21:43099236:T:C	chr21	43099236	KLF16
21:43099249:G:T	chr21	43099249	KLF13,KLF14
21:43099259:C:T	chr21	43099259	KLF4,KLF5
21:43099267:G:A	chr21	43099267	TEAD1,TEAD4
21:43099278:G:A	chr21	43099278	KLF16,KLF7,KLF4,KLF5	rs62214189
21:43099292:C:T	chr21	43099292	Jun-AP1,FOS
21:43099293:G:A	chr21	43099293	Jun-AP1
21:43099322:G:A	chr21	43099322	JUND
21:43099344:A:G	chr21	43099344	CTCF,TFAP2C,RUNX2,TFAP2B,TFAP2A,RUNX3
21:43099407:T:C	chr21	43099407	NFY,NKX1-1
21:43099424:A:G	chr21	43099424	KLF16,KLF12,KLF7,KLF13,KLF14		-3.61573	0.00961062
21:43099444:G:A	chr21	43099444	CTCF
21:43099445:T:C	chr21	43099445	CTCF,TFAP2C,TFAP2,TFAP2B,TFAP2A
21:43099486:G:A	chr21	43099486	CTCF,STAT
21:43099487:G:A	chr21	43099487	CTCF,STAT,IRF
21:43099521:T:C	chr21	43099521	ETS,IRF7
21:43099530:T:C	chr21	43099530	IRF7
21:43099546:G:T	chr21	43099546	NKX2-5		-4.3084	0.00105953
21:43099585:G:T	chr21	43099585	TLX	rs12106341	-3.95079	0.00353017
21:43099589:G:A	chr21	43099589	TLX
21:43099652:T:A	chr21	43099652	NKX2-6
21:43099670:T:C	chr21	43099670	TEAD1,TEAD3
21:43099698:T:TC	chr21	43099698	KLF16,PLAG1
21:43099703:C:A	chr21	43099703	CEBPB,PLAG1,KLF4	rs184201157
21:43099704:C:A	chr21	43099704	PLAG1
21:43099705:C:A	chr21	43099705	PLAG1
21:43099705:C:G	chr21	43099705	PLAG1
21:43099707:C:A	chr21	43099707	TFAP2
21:43099708:G:A	chr21	43099708	ETS
21:43126753:C:T	chr21	43126753	KLF13
21:43126754:G:A	chr21	43126754	KLF13
21:43126755:T:C	chr21	43126755	KLF13
21:43126816:T:A	chr21	43126816	NKX2-2,NKX2-4	rs13047070
21:43126868:C:A	chr21	43126868	CTCF		2.93446	0.0513789
21:43126869:C:T	chr21	43126869	CTCF,STAT
21:43126879:C:T	chr21	43126879	CTCF,ETS		3.42596	0.0160616
21:43126901:T:C	chr21	43126901	Jun-AP1,PLAG1,FOS		-8.23984	1.86534e-13
21:43126905:C:T	chr21	43126905	Jun-AP1,NFY
21:43126906:G:A	chr21	43126906	Jun-AP1
21:43126921:C:T	chr21	43126921	ETS
21:43126930:C:A	chr21	43126930	RUNX1,ETS,NF1
21:43126931:T:C	chr21	43126931	ETS
21:43126944:C:T	chr21	43126944	IRF
21:43126976:C:A	chr21	43126976	IRF2,ETS,IRF5,ISRE,IRF3,IRF4,IRF,IRF1
21:43126977:C:T	chr21	43126977	IRF8,IRF2,IRF3,IRF4,IRF9,IRF,IRF1,IRF7
21:43126982:G:A	chr21	43126982	IRF8,IRF2,IRF3,IRF4,IRF9,IRF,IRF1,IRF7
21:43126987:T:C	chr21	43126987	CEBP,IRF8,IRF2,IRF5,ISRE,IRF3,IRF4,IRF9,IRF1,IRF,IRF7
21:43126988:A:T	chr21	43126988	IRF8,IRF9,IRF2,IRF3,IRF,IRF4,IRF7
21:43127008:T:G	chr21	43127008	KLF16
21:43127065:A:G	chr21	43127065	CEBP,CEBPD,CEBPA,CEBPB,CEBPE,CEBPG
21:43127071:C:T	chr21	43127071	CEBPA
21:43127072:G:A	chr21	43127072	CEBPA
21:43127076:C:G	chr21	43127076	CEBPA
21:43127095:T:G	chr21	43127095	FOXA2
21:43127160:T:C	chr21	43127160	RUNX1
21:43127163:T:G	chr21	43127163	RUNX1
21:43127188:G:T	chr21	43127188	IRF7		2.87523	0.058185
21:43127199:G:A	chr21	43127199	NKX6-1,STAT3
21:43127200:G:T	chr21	43127200	NKX6-1
21:43127205:C:T	chr21	43127205	HNF1A,HNF1B,HNF1,NKX6-1		3.10232	0.0354755
21:43127216:T:C	chr21	43127216	CEBP,CEBPD,CEBPB
21:43127232:A:AT	chr21	43127232	RUNX1
21:43127259:T:TC	chr21	43127259	KLF16
21:43127259:T:TCC	chr21	43127259	KLF16
21:43127262:C:A	chr21	43127262	KLF16
21:43127306:G:C	chr21	43127306	IRF,IRF1
21:43127316:C:A	chr21	43127316	RUNX1,NKX3-1	rs9984948
21:43127351:G:A	chr21	43127351	FOXA
21:43127363:C:T	chr21	43127363	ETS,KLF4
21:43127405:C:A	chr21	43127405	FOXA
21:43127428:T:G	chr21	43127428	NKX2-1
21:43127480:C:T	chr21	43127480	TEAD
21:43127528:C:T	chr21	43127528	ISRE,IRF,IRF1,IRF7
21:43127534:T:TG	chr21	43127534	ISRE,IRF,IRF1,IRF7
21:43127556:G:C	chr21	43127556	CEBP,CEBPA,CEBPD,CEBPB,CEBPE,CEBPG
21:43127572:A:C	chr21	43127572	ETS,RUNX1,RUNX,RUNX2		-3.29634	0.022406
21:43127653:A:G	chr21	43127653	IRF,IRF1,IRF7
21:43127710:AT:A	chr21	43127710	IRF7		3.00472	0.044168
21:43127849:G:A	chr21	43127849	Jun-AP1
21:43127860:C:A	chr21	43127860	Jun-AP1
21:43127876:C:T	chr21	43127876	ETS
21:43127877:G:A	chr21	43127877	ETS
21:43127880:G:A	chr21	43127880	ETS
21:43127893:C:T	chr21	43127893	NKX2-2,NKX3-1
21:43127899:G:A	chr21	43127899	NKX3-1
21:43127927:A:T	chr21	43127927	NKX2-1	rs2838089	3.21418	0.0272841
21:43127980:A:AT	chr21	43127980	TEAD1
21:43127984:C:T	chr21	43127984	TEAD1
21:43127986:C:T	chr21	43127986	TEAD1
21:43127987:G:A	chr21	43127987	TEAD1
21:43128010:C:G	chr21	43128010	TFAP2C,TFAP2,TFAP2B,TFAP2A
21:43128011:G:A	chr21	43128011	TFAP2C,TFAP2,TFAP2B,TFAP2A	rs2838090
21:43128012:A:T	chr21	43128012	TFAP2C,TFAP2,TFAP2B,TFAP2A	rs2838091
21:43128014:G:A	chr21	43128014	TFAP2C,TFAP2,TFAP2B,TFAP2A		-2.81494	0.0657772
21:43128049:C:T	chr21	43128049	CEBP
21:43128067:T:C	chr21	43128067	IRF2,IRF
21:43128126:T:A	chr21	43128126	TEAD1
21:43156615:G:A	chr21	43156615	ETS,ETS1
21:43156637:C:T	chr21	43156637	CTCF
21:43156668:T:A	chr21	43156668	CTCF
21:43156674:G:A	chr21	43156674	CTCF
21:43156740:C:A	chr21	43156740	FOXA	rs2838111
21:43156762:G:A	chr21	43156762	STAT
21:43156792:G:C	chr21	43156792	NKX2-1
21:43156831:G:A	chr21	43156831	KLF16,NKX3-1
21:43156867:C:T	chr21	43156867	TFAP2C,TFAP2,TFAP2B,TFAP2A		2.78802	0.0694565
21:43156881:G:A	chr21	43156881	CTCF
21:43156887:T:G	chr21	43156887	CTCF
21:43156899:C:T	chr21	43156899	PROX1
21:43156900:G:A	chr21	43156900	ETS,TLX,PROX1
21:43156945:C:G	chr21	43156945	CTCF,NKX2-2,NKX3-2,NKX2-1		-3.02946	0.0418147
21:43157053:T:C	chr21	43157053	ETS
21:43157063:C:T	chr21	43157063	PLAG1
21:43157076:G:A	chr21	43157076	ETS,KLF4
21:43157095:T:C	chr21	43157095	PLAG1
21:43157139:A:T	chr21	43157139	CTCF,TFAP2C,TFAP2,TFAP2B,TFAP2A
21:43157143:G:A	chr21	43157143	TFAP2C,TFAP2,TFAP2B,TFAP2A
21:43157184:G:A	chr21	43157184	ETS
21:43157192:A:T	chr21	43157192	TEAD1
21:43181102:A:G	chr21	43181102	ETS,ETS1
21:43181126:A:G	chr21	43181126	CTCF,TFAP2C,TFAP2,TFAP2B,TFAP2A
21:43181132:TGG:T	chr21	43181132	TFAP2C,TFAP2,TFAP2B,TFAP2A
21:43181139:C:T	chr21	43181139	PLAG1		3.03813	0.0410373
21:43181148:G:A	chr21	43181148	PLAG1
21:43181181:C:T	chr21	43181181	NFY,ETS
21:43181182:G:A	chr21	43181182	ETS
21:43181204:G:A	chr21	43181204	CTCF
21:43181316:G:A	chr21	43181316	CEBPA
21:43181319:T:A	chr21	43181319	CEBPA
21:43181378:C:T	chr21	43181378	IRF2,STAT1,HNF1,IRF,IRF1,IRF4
21:43181379:G:A	chr21	43181379	IRF2,STAT1,HNF1,IRF,IRF4
21:43181403:C:A	chr21	43181403	IRF9,STAT1,IRF3,IRF,IRF1
21:43181441:C:T	chr21	43181441	NFY
21:43181460:T:A	chr21	43181460	MEF2
21:43181467:T:C	chr21	43181467	MEF2,MEF2A
21:43181497:C:T	chr21	43181497	NF1
21:43181601:C:T	chr21	43181601	CEBPA
21:43181602:G:A	chr21	43181602	CEBPA		-2.82926	0.0638955
21:43181627:C:G	chr21	43181627	KLF12,KLF7
21:43181628:G:A	chr21	43181628	KLF16,TLX,KLF7,KLF4,KLF5,KLF14
21:43181661:G:A	chr21	43181661	CTCF
21:43181665:ACT:A	chr21	43181665	CTCF,TFAP2
21:43181667:T:A	chr21	43181667	TFAP2,ETS1
21:43181674:C:G	chr21	43181674	TFAP2C,TFAP2,TFAP2B,TFAP2A,NF1
21:43181679:C:T	chr21	43181679	TFAP2C,TFAP2,TFAP2B,TFAP2A
21:43181680:G:A	chr21	43181680	TFAP2C,TFAP2,TFAP2B,TFAP2A
21:43181685:C:T	chr21	43181685	ETS,ETS1
21:43181686:G:A	chr21	43181686	ETS,ETS1
21:43181686:G:C	chr21	43181686	ETS,NF1,ETS1
21:43181686:GA:G	chr21	43181686	ETS,ETS1
21:43181697:C:T	chr21	43181697	ETS,ETS1
21:43181698:G:A	chr21	43181698	ETS,ETS1		-2.8491	0.0613627
21:43181715:A:G	chr21	43181715	ETS		2.68597	0.0847033
21:43181721:T:C	chr21	43181721	ETS
21:43181749:C:T	chr21	43181749	TFAP2C,TFAP2,TFAP2B,TFAP2A
21:43181752:C:T	chr21	43181752	TFAP2C,TFAP2,TFAP2B,TFAP2A
21:43181753:G:A	chr21	43181753	TFAP2C,TFAP2,TFAP2B,TFAP2A
21:43181755:A:G	chr21	43181755	TFAP2C,TFAP2,TFAP2B,TFAP2A
21:43181879:G:A	chr21	43181879	STAT
21:43181929:G:A	chr21	43181929	NKX2-3,NKX3-2,NKX3-1
21:43181948:A:G	chr21	43181948	NKX2-5,NKX2-2,NKX2-4,NKX2-1,MEF2A
21:43181955:G:T	chr21	43181955	FOXA1,MEF2A
21:43181957:G:A	chr21	43181957	FOXA1
21:43181973:C:T	chr21	43181973	TFAP2C,TFAP2,TFAP2B,TFAP2A,FOXA,FOXA1		3.95949	0.0034326
21:43182007:C:T	chr21	43182007	CEBP
21:43182027:T:C	chr21	43182027	NFY,NKX1-1
21:43182029:G:A	chr21	43182029	NFY,NKX1-1	rs8130571
21:43182031:C:T	chr21	43182031	NFY,NKX1-1
21:43182077:C:T	chr21	43182077	KLF7
21:43182098:T:C	chr21	43182098	NKX3-1
21:43182102:C:T	chr21	43182102	NKX3-1
21:43182107:C:T	chr21	43182107	TFAP2
21:43182109:T:C	chr21	43182109	TFAP2,KLF4,KLF5,TFAP2C,KLF16,TFAP2B,KLF7,TFAP2A
21:43182115:G:A	chr21	43182115	TFAP2C,TFAP2,TFAP2B,TFAP2A
21:43182121:T:C	chr21	43182121	CTCF,TFAP2,STAT6
21:43182124:C:G	chr21	43182124	STAT6
21:43182127:C:A	chr21	43182127	STAT6
21:43182132:C:T	chr21	43182132	STAT6		-3.09472	0.0360988
21:43182213:G:A	chr21	43182213	IRF4
21:43182237:G:C	chr21	43182237	CEBPD
21:43182246:C:T	chr21	43182246	NKX2-1
21:43182252:T:C	chr21	43182252	CEBP,CEBPD,CEBPA,CEBPB,CEBPE,CEBPG
21:43182256:C:T	chr21	43182256	CEBP,CEBPD,CEBPA,CEBPB,CEBPE,CEBPG
21:43182257:G:A	chr21	43182257	CEBP,CEBPD,CEBPA,CEBPB,CEBPE,CEBPG
21:43182283:G:A	chr21	43182283	STAT
21:43182287:TC:T	chr21	43182287	STAT
21:43182292:C:T	chr21	43182292	IRF2,IRF1
21:43182346:G:GA	chr21	43182346	STAT3,IRF1
21:43182346:GA:G	chr21	43182346	STAT3,IRF1
21:43182381:T:C	chr21	43182381	CTCF
21:43182427:C:T	chr21	43182427	TEAD4
21:43182447:A:AC	chr21	43182447	KLF12,KLF7,KLF4,KLF5
21:43182489:C:T	chr21	43182489	KLF16,PLAG1,KLF7,KLF4,KLF5,KLF14
21:43182490:G:A	chr21	43182490	CTCF,KLF12,KLF7,KLF14
21:43182491:G:A	chr21	43182491	KLF7
21:43182497:T:C	chr21	43182497	TLX
21:43182499:G:A	chr21	43182499	TLX
21:43182504:C:T	chr21	43182504	TLX
21:43182587:A:T	chr21	43182587	NF1
21:43182594:C:T	chr21	43182594	KLF7,NF1
21:43182595:G:A	chr21	43182595	KLF12,KLF7,NF1
21:43182597:C:A	chr21	43182597	KLF12,KLF7
21:43182600:C:T	chr21	43182600	TLX,KLF12,KLF7		-3.09929	0.0357213
21:43182601:G:A	chr21	43182601	KLF12,KLF7		-2.87485	0.0582303
21:43182618:C:G	chr21	43182618	ETS
21:43182618:C:T	chr21	43182618	ETS
21:43182619:A:G	chr21	43182619	ETS
21:43182629:T:C	chr21	43182629	ETS
21:43182633:C:T	chr21	43182633	STAT	rs3895614
21:43182634:G:A	chr21	43182634	STAT,PLAG1
21:43481394:G:T	chr21	43481394	NKX1-1	rs220261
21:43481406:C:T	chr21	43481406	PLAG1
21:43481407:G:A	chr21	43481407	CTCF,PLAG1
21:43481599:A:G	chr21	43481599	NKX2-2,NKX2-8,NKX2-1		5.27468	2.09191e-05
21:43481683:TC:T	chr21	43481683	CTCF
21:43481712:C:T	chr21	43481712	TFAP2C,TFAP2,TFAP2B,TFAP2A
21:43481735:C:T	chr21	43481735	TFAP2C,TFAP2,TFAP2B,TFAP2A
21:43481736:G:A	chr21	43481736	TFAP2C,TFAP2,TFAP2B,TFAP2A
21:43481766:C:T	chr21	43481766	ETS,IRF,ETS1		3.42641	0.0160423
21:43481767:G:A	chr21	43481767	ETS,IRF,ETS1
21:43481772:C:A	chr21	43481772	IRF
21:43481772:C:T	chr21	43481772	IRF
21:43481773:G:A	chr21	43481773	IRF
21:43481789:G:T	chr21	43481789	TFAP2A
21:43481825:C:A	chr21	43481825	PLAG1
21:43481836:C:A	chr21	43481836	TFAP2C
21:43481846:C:A	chr21	43481846	TFAP2C,ETS,TFAP2,RUNX2,TFAP2B,TFAP2A,RUNX3
21:43481846:C:T	chr21	43481846	TFAP2C,ETS,TFAP2,RUNX2,TFAP2B,TFAP2A,RUNX3
21:43481847:G:A	chr21	43481847	ETS,TFAP2,RUNX2,ETS1,TFAP2C,STAT,TFAP2B,TFAP2A,RUNX3
21:43481847:G:C	chr21	43481847	ETS,TFAP2,RUNX2,ETS1,TFAP2C,STAT,TFAP2B,TFAP2A,RUNX3
21:43481870:C:T	chr21	43481870	TFAP2C,TFAP2,TFAP2B,TFAP2A		-3.65599	0.00857085
21:43481873:C:T	chr21	43481873	TFAP2C,TFAP2,TFAP2B,TFAP2A
21:43481874:G:A	chr21	43481874	TFAP2C,TFAP2,TFAP2B,TFAP2A
21:43481875:T:TG	chr21	43481875	CTCF,TFAP2C,TFAP2,TFAP2B,TFAP2A
21:43481916:C:T	chr21	43481916	CTCF
21:43481957:C:T	chr21	43481957	CTCF
21:43481958:A:G	chr21	43481958	CTCF
21:43481974:C:T	chr21	43481974	CTCF
21:43481975:G:A	chr21	43481975	CTCF
21:43482015:A:G	chr21	43482015	NKX2-1		4.43091	0.000680377
21:43482062:C:T	chr21	43482062	PLAG1
21:43482105:G:A	chr21	43482105	NKX2-5,NKX2-2,NKX2-6
21:43482109:A:C	chr21	43482109	NKX2-3,NKX2-5,NKX2-2,NKX2-8,NKX2-1
21:43482131:G:A	chr21	43482131	STAT6
21:43482132:A:G	chr21	43482132	TFAP2
21:43482201:G:A	chr21	43482201	NF1
21:43482227:C:T	chr21	43482227	IRF3,IRF,IRF1,IRF7
21:43482232:C:T	chr21	43482232	IRF3,IRF
21:43482233:C:T	chr21	43482233	IRF
21:43482291:A:G	chr21	43482291	TFAP2C,TFAP2,TFAP2B,TFAP2A
21:43482309:C:T	chr21	43482309	IRF2,CEBPA
21:43482313:A:G	chr21	43482313	CEBPA
21:43482323:G:C	chr21	43482323	NKX2-1		4.84263	0.000135362
21:43482356:G:A	chr21	43482356	STAT
21:43482373:G:A	chr21	43482373	IRF,KLF4
21:43482437:G:A	chr21	43482437	PROX1
21:43482449:C:T	chr21	43482449	IRF3,IRF
21:43482450:A:C	chr21	43482450	IRF
21:43482450:AG:A	chr21	43482450	IRF9,IRF3,IRF
21:43482459:C:T	chr21	43482459	IRF8,IRF9,STAT1,IRF5,ISRE,IRF
21:43482460:G:A	chr21	43482460	IRF8,IRF9,STAT1,IRF5,ISRE,IRF,IRF1
21:43482520:G:A	chr21	43482520	TFAP2
21:43482520:G:T	chr21	43482520	TFAP2C,TFAP2
21:43482578:G:A	chr21	43482578	PLAG1,KLF7
21:43482608:A:T	chr21	43482608	KLF7,KLF4,KLF5
21:43482615:G:A	chr21	43482615	CTCF,KLF7
21:43482619:T:C	chr21	43482619	CTCF
21:43482621:T:C	chr21	43482621	CTCF
21:43482626:C:T	chr21	43482626	CTCF
21:43482627:G:A	chr21	43482627	CTCF
21:43482628:C:T	chr21	43482628	CTCF
21:43482629:G:A	chr21	43482629	CTCF
21:43482635:C:T	chr21	43482635	CTCF
21:43482642:C:A	chr21	43482642	CTCF
21:43482678:C:T	chr21	43482678	IRF,IRF7
21:43482691:A:G	chr21	43482691	TEAD1
21:43482700:A:G	chr21	43482700	TEAD,TEAD1,TEAD4,TEAD3
21:43482715:C:G	chr21	43482715	TFAP2C,TFAP2,TFAP2B,TFAP2A
21:43482717:A:C	chr21	43482717	TFAP2,TFAP2C,RUNX1,KLF16,TFAP2B,PLAG1,TFAP2A,PROX1
21:43482720:G:A	chr21	43482720	TFAP2C,TFAP2,TFAP2B,TFAP2A,PROX1
21:43482721:C:A	chr21	43482721	TFAP2C,TFAP2,TFAP2B,TFAP2A,PROX1
21:43482724:C:T	chr21	43482724	PROX1
21:43482743:T:C	chr21	43482743	CEBP
21:43482752:G:T	chr21	43482752	ISRE
21:43482782:C:T	chr21	43482782	KLF16,RUNX2,RUNX3		-3.57484	0.0107713
21:43482791:C:A	chr21	43482791	RUNX2,NKX2-1,RUNX3
21:43482791:C:T	chr21	43482791	RUNX3
21:43482792:G:A	chr21	43482792	RUNX2,RUNX3
21:43482802:C:T	chr21	43482802	FOXA1
21:43482821:C:A	chr21	43482821	MEF2C,NF1
21:43482831:C:G	chr21	43482831	ETS
21:43482833:G:T	chr21	43482833	ETS
21:43482835:C:T	chr21	43482835	ETS
21:43482836:G:A	chr21	43482836	ETS
21:43482846:C:T	chr21	43482846	KLF16,KLF7,KLF4,KLF5
21:43482846:CG:C	chr21	43482846	KLF16,KLF7,KLF4,KLF5
21:43482847:G:A	chr21	43482847	KLF16,KLF7,KLF4,KLF5
21:43482853:C:T	chr21	43482853	KLF7
21:43482854:G:A	chr21	43482854	PLAG1,KLF7
21:43482861:C:T	chr21	43482861	PLAG1
21:43482863:G:A	chr21	43482863	PLAG1
21:43482871:G:C	chr21	43482871	KLF7
21:43482874:A:C	chr21	43482874	CTCF,PLAG1
21:43482890:G:A	chr21	43482890	PLAG1
21:43482913:A:G	chr21	43482913	NFY,NKX1-1		2.71048	0.0808284
21:43482920:G:A	chr21	43482920	NFY,NKX1-1
21:43482925:C:T	chr21	43482925	PLAG1
21:43482959:G:A	chr21	43482959	ETS
21:43483072:G:A	chr21	43483072	CTCF
21:43483087:C:A	chr21	43483087	CTCF
21:43483091:G:C	chr21	43483091	NF1
21:43483126:G:A	chr21	43483126	STAT,PLAG1
21:43483135:C:T	chr21	43483135	ETS,STAT1,STAT,STAT3
21:43483146:T:G	chr21	43483146	STAT1,STAT,STAT4,STAT3,NF1
21:43483163:A:G	chr21	43483163	NFY
21:43483195:G:T	chr21	43483195	STAT
21:43483243:T:A	chr21	43483243	TLX
21:43483291:T:C	chr21	43483291	JUND
21:43483397:G:C	chr21	43483397	NKX3-2,TLX	rs220266	4.27033	0.00121546
21:43483441:C:G	chr21	43483441	STAT1,IRF2,ISRE,IRF3,IRF,IRF1,ETS1	rs114272312	-6.42836	5.00371e-08
21:43483507:G:A	chr21	43483507	CTCF,PLAG1
21:43483516:C:T	chr21	43483516	CTCF
21:43483520:G:A	chr21	43483520	CTCF,PLAG1
21:43483522:G:A	chr21	43483522	CTCF		-2.60772	0.0980069
21:43483523:T:C	chr21	43483523	CTCF,PLAG1
21:43483559:G:A	chr21	43483559	TLX,NF1
21:43483574:G:C	chr21	43483574	MEF2
21:43483576:A:AT	chr21	43483576	MEF2
21:43483588:GC:G	chr21	43483588	MEF2,STAT3
21:43483635:T:G	chr21	43483635	ETS,STAT4,STAT3,NF1
21:43483658:C:T	chr21	43483658	ETS,KLF4
21:43483663:T:C	chr21	43483663	ETS,KLF4
21:43483677:G:C	chr21	43483677	NKX2-1
21:43483749:C:T	chr21	43483749	TFAP2
21:43483750:C:T	chr21	43483750	TFAP2
21:43483798:A:G	chr21	43483798	NKX2-1
21:43483809:A:G	chr21	43483809	CTCF
21:43483811:A:G	chr21	43483811	CTCF
21:43483822:C:A	chr21	43483822	CTCF
21:43483825:G:A	chr21	43483825	CTCF
21:43483827:C:T	chr21	43483827	CTCF
21:43483828:G:A	chr21	43483828	CTCF
21:43483852:TG:T	chr21	43483852	TFAP2C,TFAP2,TFAP2B,PLAG1,TFAP2A
21:43483855:C:G	chr21	43483855	TFAP2C,TFAP2,TFAP2B,PLAG1,TFAP2A
21:43483855:C:T	chr21	43483855	TFAP2C,TFAP2,PLAG1,TFAP2A
21:43483864:C:T	chr21	43483864	TFAP2C,TFAP2,TFAP2A
21:43483885:G:T	chr21	43483885	KLF14		-3.0548	0.0395236
21:43483887:G:A	chr21	43483887	KLF14	rs11700552
21:43483922:G:T	chr21	43483922	ETS,ETS1
21:43483936:C:T	chr21	43483936	ETS,ETS1
21:43483946:C:T	chr21	43483946	ETS
21:43483947:G:A	chr21	43483947	ETS		-3.08015	0.0373298
21:43483963:C:T	chr21	43483963	KLF7
21:43483965:T:C	chr21	43483965	KLF4,KLF5
21:43483987:C:T	chr21	43483987	NKX3-1
21:43484021:G:A	chr21	43484021	CEBPB
21:43484027:C:T	chr21	43484027	CTCF,TFAP2,TFAP2B,PLAG1,TFAP2A
21:43484030:C:T	chr21	43484030	CTCF,TFAP2,TFAP2B,PLAG1,TFAP2A
21:43484033:C:T	chr21	43484033	TFAP2,TFAP2B,PLAG1,TFAP2A
21:43484039:A:G	chr21	43484039	IRF4
21:43484085:G:A	chr21	43484085	NKX2-1
21:43484092:G:A	chr21	43484092	TEAD1,RUNX2,RUNX3
21:43484110:G:A	chr21	43484110	Jun-AP1,FOS		3.19682	0.0284381
21:43484167:G:T	chr21	43484167	TFAP2C,TFAP2,KLF16,TFAP2B,PLAG1,TFAP2A,NKX2-1
21:43484176:G:C	chr21	43484176	TFAP2C,TFAP2,TLX,PLAG1,TFAP2A
21:43484181:T:C	chr21	43484181	ETS,ETS1
21:43484242:G:A	chr21	43484242	TEAD1,TEAD3
21:43484248:C:T	chr21	43484248	CTCF
21:43484249:G:A	chr21	43484249	NF1
21:43484266:A:T	chr21	43484266	NFY		-3.82674	0.00519045
21:43484283:C:T	chr21	43484283	ETS,ETS1
21:43484288:C:T	chr21	43484288	ETS,ETS1
* hg19 coordinates
** minor allele frequency > .05 in human populations
*** effect aligned to the alternate allele
